# Across-population genomic prediction in grapevine opens up promising prospects for breeding

Charlotte Brault<sup>1,2,3</sup>; Vincent Segura<sup>1,2</sup>; Patrice This<sup>1,2</sup>; Loïc Le Cunff<sup>1,2,3</sup>; Timothée Flutre<sup>4</sup>; Pierre François<sup>1,2</sup>; Thierry Pons<sup>1,2</sup>; Jean-Pierre Péros<sup>1,2</sup>; Agnès Doligez\*<sup>1,2</sup>

1: UMT Geno-Vigne®, IFV-INRAE-Institut Agro, F-34398 Montpellier, France

2: UMR AGAP Institut, Univ Montpellier, CIRAD, INRAE, Institut Agro, F-34398 Montpellier, France

3: Institut Français de la Vigne et du Vin, F-34398 Montpellier, France

4: Université Paris-Saclay, INRAE, CNRS, AgroParisTech, GQE – Le Moulon, 91190, Gif-sur-Yvette, France

Corresponding author: Agnès Doligez, UMR AGAP Institut, Univ Montpellier, CIRAD, INRAE, Institut Agro, F-34398 Montpellier, France. E-mail: [agnes.doligez@inrae.fr](mailto:agnes.doligez@inrae.fr).

## Abstract

Crop breeding involves two selection steps: choosing progenitors and selecting offspring within progenies. Genomic prediction, based on genome-wide marker estimation of genetic values, could facilitate these steps. However, its potential usefulness in grapevine (*Vitis vinifera* L.) has only been evaluated in non-breeding contexts mainly through cross-validation within a single population. We tested across-population genomic prediction in a more realistic breeding configuration, from a diversity panel to ten bi-parental crosses connected within a half-diallel mating design. Prediction quality was evaluated over 15 traits of interest (related to yield, berry composition, phenology and vigour), for both the average genetic value of each cross (cross mean) and the genetic values of individuals within each cross (individual values). Genomic prediction in these conditions was found useful: for cross mean, average per-trait predictive ability was 0.6, while per-cross predictive ability was halved on average, but reached a maximum of 0.7. Mean predictive ability for individual values within crosses was 0.26, about half the within-half-diallel value taken as a reference. For some traits and/or crosses, these across-population predictive ability values are promising for implementing genomic selection in grapevine breeding. This study also provided key insights on variables affecting predictive ability. Per-cross predictive ability was well predicted by genetic distance between parents and when this predictive ability was below 0.6, it was improved by training set optimization. For individual values, predictive ability mostly depended on trait-related variables (magnitude of the cross effect and heritability). These results will greatly help designing grapevine breeding programs assisted by genomic prediction.

**Keywords:** *genomic prediction, grapevine, half-diallel, multi-parental population, diversity panel, across-population*

# Introduction

---

1 Breeding for perennial species is mostly based on phenotypic selection and is hindered by cumbersome field  
2 trials and the long generation time. Genomic prediction (GP), based on genome-wide prediction of genetic  
3 values <sup>1</sup>, has been widely adopted in modern plant and animal breeding programs, for its superiority in terms of  
4 cost and time saved compared to traditional phenotypic selection, but also because it allows handling traits with  
5 complex genetic determinism. GP requires a model training step within a reference population, prior to model  
6 application to a target population of selection candidates <sup>2</sup>. In perennial crops, a universal population  
7 encompassing most of the species' genetic diversity could be particularly interesting as a training population to  
8 reduce phenotyping effort, since breeding cycle and juvenile phase are long.

9 Breeding schemes typically involve first the choice of parents (individuals to be crossed) and then the selection  
10 of offspring within crosses. GP is adapted both for predicting cross mean and for ranking genotypes within a  
11 cross (Mendelian sampling). These steps correspond to the components of the predictive ability (PA) of GP. It is  
12 indeed defined as the sum of cross mean and Mendelian sampling terms, as detailed in Werner et al. <sup>3</sup>.

13 Under an additive framework, cross mean is expected to be the sum of the breeding values of parents, but  
14 some deviation may result from dominance or epistasis <sup>4</sup>. So far, a few studies only have investigated cross  
15 mean PA <sup>5, 6, 7, 8</sup>, although none of them clearly investigated its influencing parameters.

16 In contrast, the prediction of genetic values within a cross (Mendelian sampling), has been widely studied, both  
17 with simulated and real data. Various parameters affecting PA have been pointed out, including the statistical  
18 method used <sup>9</sup>, the composition and size of training and validation populations <sup>10, 11</sup>, the trait genetic  
19 architecture and heritability <sup>12, 13</sup> and marker density <sup>14</sup>. Genetic relationship between the training and validation  
20 sets is known to strongly affect PA <sup>15</sup>, with low or even sometimes negative accuracies for across-breed GP in  
21 animals <sup>16</sup>. This can be explained by the loss of linkage phase between the marker and QTL or by differences in  
22 linkage disequilibrium among populations <sup>17</sup>. Another explanation is the presence of specific allelic effects and  
23 allele frequencies, due to the genetic background <sup>18</sup>. All these effects are linked to genetic relationship. Some  
24 studies specifically derived deterministic equations to predict PA for across-population GP, based on genetic  
25 relationship and heritability (e.g., [19](#), [20](#), [21](#)).

26 In grapevine (*Vitis vinifera* subsp. *vinifera*), very few authors have assessed the potential interest of GP. Viana et  
27 al. <sup>22</sup> investigated GP within a bi-parental population from a cross between an interspecific hybrid and a seedless  
28 table grape. Later, Migicovsky et al. <sup>23</sup> used a panel of 580 *V. vinifera* accessions to perform both GP and  
29 genome-wide association study (GWAS) for 33 phenotypes. More recently, Brault et al. <sup>24</sup> investigated GP within  
30 a bi-parental population from a cross between Syrah and Grenache. In a related study, Fodor et al. <sup>25</sup> had  
31 simulated a structured and highly diverse grapevine panel and bi-parental populations with parents originating  
32 from the panel. They applied GP and found little difference between PA values estimated within the panel or  
33 across populations. Finally, Flutre et al. <sup>26</sup> studied 127 traits with GWAS and GP within a diversity panel; they  
34 also applied across-population GP, but with 23 test offspring and for one trait only. Before genomic selection  
35 can be deployed in grapevine, evaluating PA across populations is thus crucially needed. In particular, PA should  
36 be evaluated with a diversity panel and a bi-parental progeny as training and validation sets, respectively, a

Across-population genomic prediction in grapevine

37 configuration much more likely to occur in actual breeding schemes than GP within the same population. As in  
 38 grape, studies investigating across-population GP are also lacking in most clonally propagated crops.

39 The aim of this study was to assess across-population genomic PA and to provide a more thorough  
 40 understanding of parameters affecting PA in a situation close to the one typically encountered in a breeding  
 41 context, i.e. across populations, for a clonally propagated crop such as grapevine. Our study was based on  
 42 phenotypic data for 15 traits, related to yield, berry composition, phenology and vigour, measured both in a  
 43 diversity panel <sup>27</sup>, and in a half-diallel with 10 bi-parental crosses. We assessed PA under three scenarios, first  
 44 for cross mean, and then for Mendelian sampling term; the results provided keys to understand PA  
 45 determinants in both cases. Finally, we implemented training population optimization to investigate under  
 46 which conditions PA can be improved.

## 47 Results

### 48 Extent of genetic diversity within the half-diallel 49 population

50

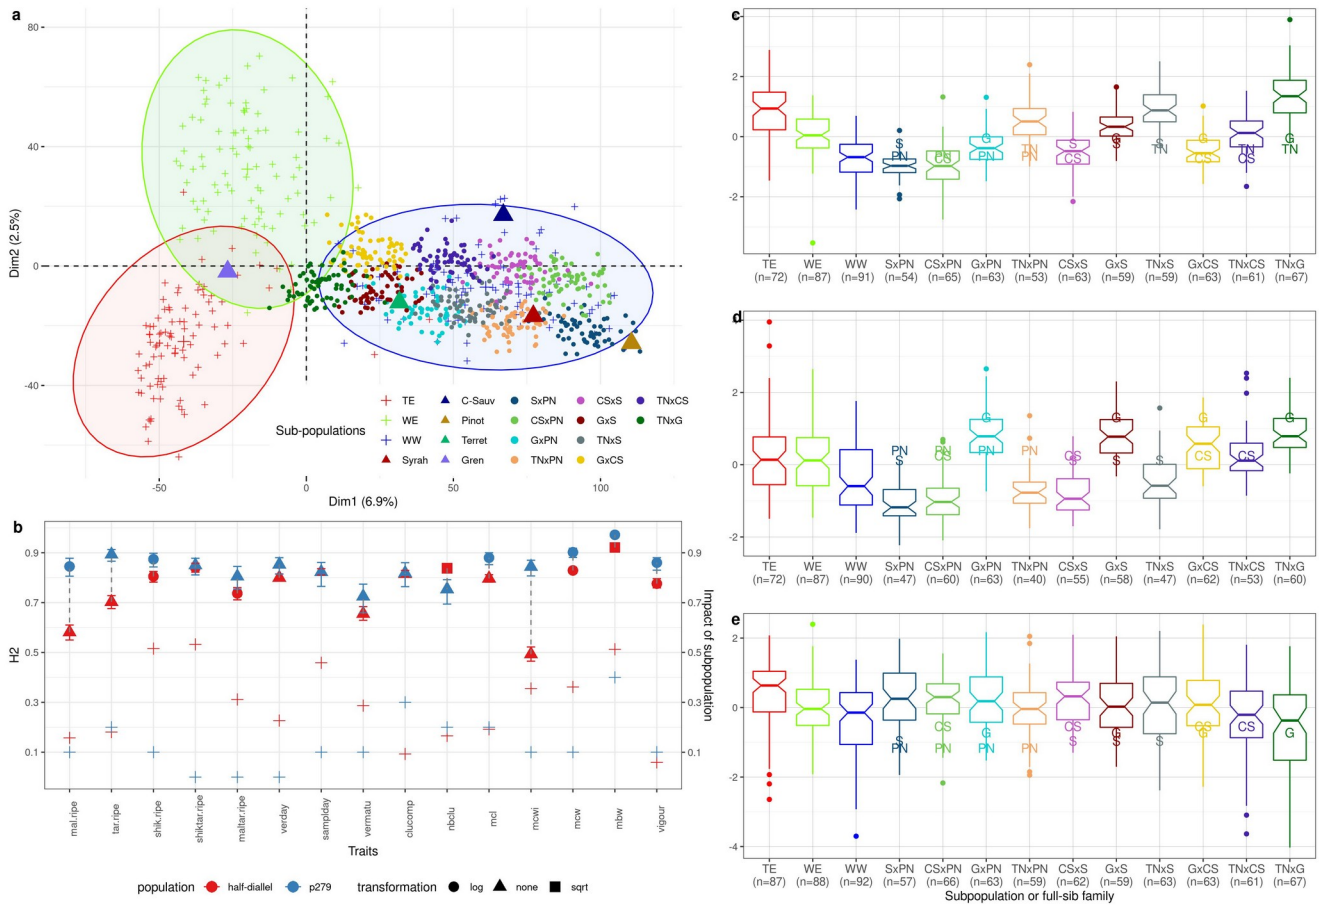

51

*Across-population genomic prediction in grapevine*

52 Figure 1: Description of the half-diallel, relative to the diversity panel. a: PCA of the diversity panel based on 32,894 SNPs with the 3 sub-  
53 populations distinguished by different colors, on which half-diallel progenies (dots) and parents (triangles) were projected. b: Broad-sense  
54 heritability estimates in the whole half-diallel (red) and in the diversity panel (blue) for the 15 traits studied (left axis), with shape  
55 corresponding to the transformation applied to raw data; the relative variance due to the cross effect and the  $R^2$  of the subpopulation effect, for  
56 the half-diallel (red) and the diversity panel (blue), respectively, are also reported with '+' (right axis). c, d, e: genotypic value BLUP distribution  
57 in each subpopulation or progeny, for mean berry weight, mean cluster width and vigour, respectively; BLUPs for parents are indicated by their  
58 initial letters (Table S4). Number of genotypes per subpopulation/progeny is indicated below the subpopulation/progeny name. These traits  
59 were chosen to represent various levels of  $H^2$  and relative importance of cross effect. BLUP distributions for all traits are presented in Figure S3.

60 We first evaluated the genetic variability of half-diallel crosses with respect to the diversity panel, through their  
61 projection on the first plane of a PCA based on genotypic data at 32,894 SNPs within the diversity panel. The  
62 half-diallel crosses were genetically close to the wine west (WW) subpopulation from the diversity panel (Figure  
63 1a), which was expected, given that all half-diallel parents except Grenache are wine varieties from western  
64 Europe (Figure 1a, Figure S1). The half-diallel diversity covered the whole range of WW diversity, and progenies,  
65 all located exactly between their respective parents, were well separated from each other along the first two  
66 PCA axes (Figure 1a).

67 We then investigated broad-sense heritability values ( $H^2$ ) for 15 traits related to yield, berry composition,  
68 phenology and vigour. Overall  $H^2$  values were medium to high, ranging from 0.49 for **mcwi** in the half-diallel to  
69 0.92 for **mbw** in the panel (Figure 1b; Table S1). Correlation between half-diallel and diversity panel heritability  
70 values was 0.31. Per-cross  $H^2$  values for each trait varied among half-diallel crosses (Figure S2), which might  
71 result from the fairly small number of offspring per cross (from 64 to 70). Nevertheless, we observed a 0.68  
72 correlation between overall and per-cross  $H^2$ . Mean cluster width displayed extreme variation in  $H^2$  per cross  
73 (from 0.02 to 0.67). This might be due to the difficulty to phenotype this specific trait because of the presence  
74 of lateral wings in some individuals.

75 Within the half-diallel and for all traits, the *cross* effect was retained in the mixed model for genetic value  
76 estimation, but its magnitude with respect to the total genetic variance varied depending on the trait, ranging  
77 from less than 10% to ca. 50% (Figure 1b; Table S1). Depending on the trait or cross, the distribution of  
78 genotypic BLUPs varied widely (Figure 1c-e; Figure S3), some traits such as **vigour** being quite comparable  
79 among crosses, while others such as **mbw** or **mcwi** varied greatly. We also observed transgressive segregation  
80 within the half-diallel progenies (Figure 1c-e; Figure S3) for most traits and subpopulations. The 15 traits studied  
81 represented a large phenotypic diversity, structured among crosses (Figure S4).

82

83 Prediction of cross mean and Mendelian sampling  
84 within- and across-populations

85

86 Prediction of cross mean

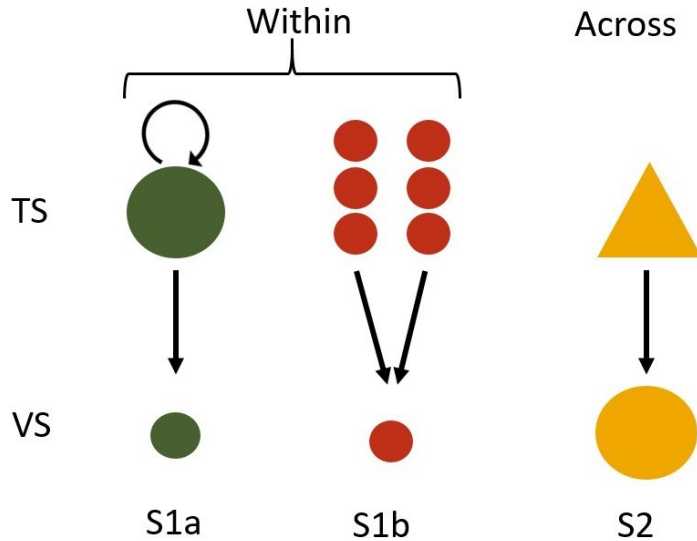

87

88 Figure 2: Schematic description of the three scenarios tested. TS: training set, VS: validation set. In scenario 1a, GP was applied within the half-  
89 diallel population with 10-fold cross-validation repeated 10 times. In scenario 1b, half-sib families from each parent were used separately as TS.  
90 In scenario 2, TS was the diversity panel. See details in Table S5.

91 We first implemented cross mean prediction, as if aiming to select parents for future crosses, selecting the  
92 method best adapted to genetic architecture between RR and LASSO (see Material and Methods). Predictive  
93 ability (PA) was assessed as Pearson's correlation between the observed mean genotypic value per half-diallel  
94 cross and the one predicted based on parental average genotypes (Table S2). Three scenarios were tested  
95 (Material and Methods, Figure 2): allelic effects estimated within the whole half-diallel (scenario 1a), in families  
96 with one parent in common (scenario 1b), or within the whole diversity panel (scenario 2).

Across-population genomic prediction in grapevine

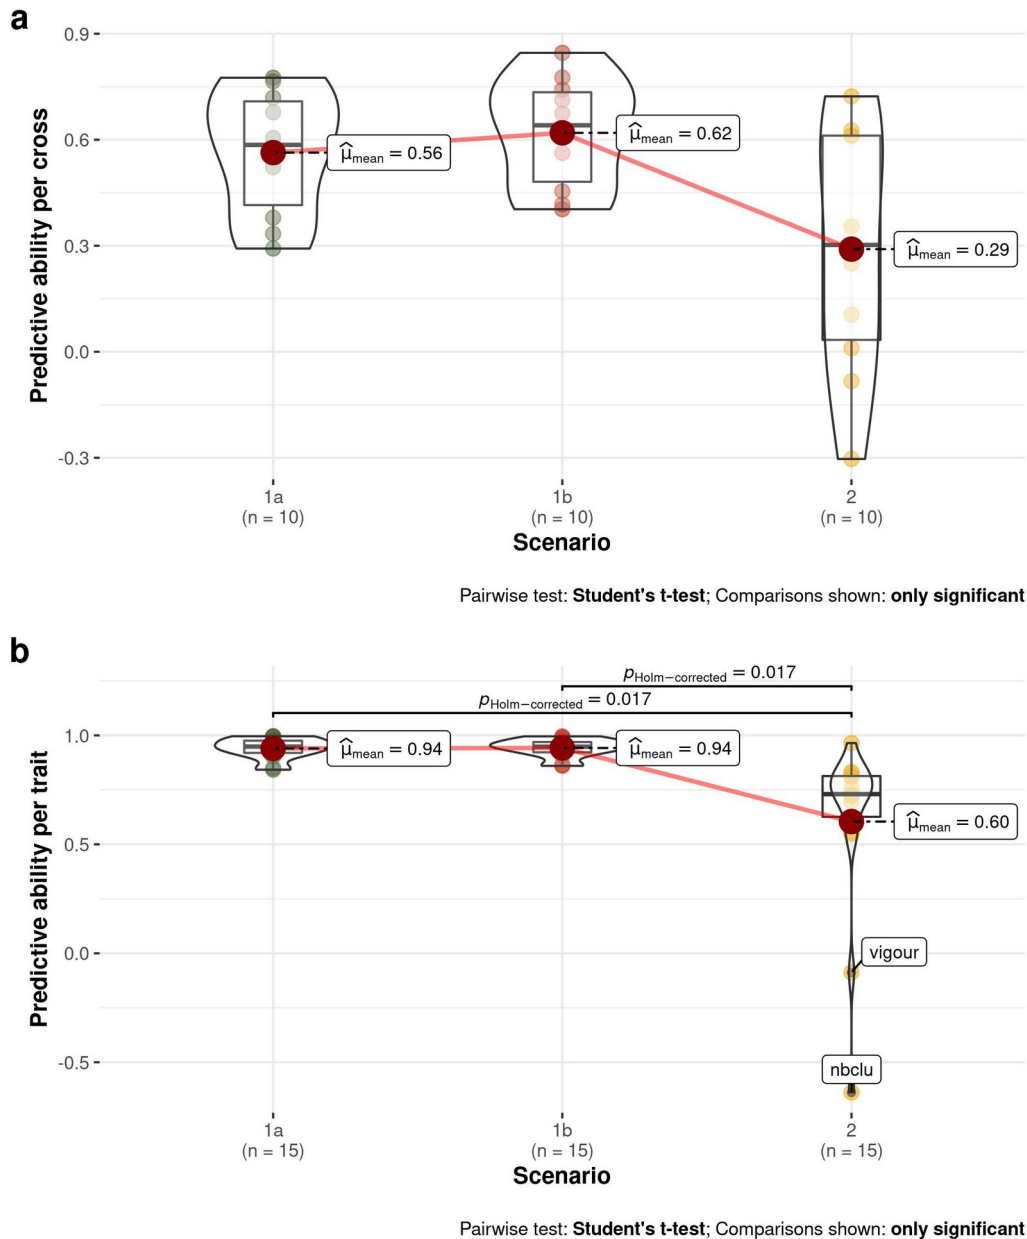

97

98 Figure 3: Boxplots of PA values for the three scenarios (1a: within whole half-diallel prediction; 1b: half-sib prediction within half-diallel; 2:  
 99 across-population prediction with diversity panel as training set and each half-diallel cross as validation set). Each PA value was the best one  
 100 obtained between RR and LASSO methods. Average PA is indicated next to each boxplot.  
 101 a: per-cross PA, b: per-trait PA.

102 In scenario 2, per-trait and per-cross predictive ability was lower and more variable than in scenarios 1a and 1b  
 103 (Figure 3). Average per-cross PA was 0.56, 0.62 and 0.29 in scenarios 1a, 1b and 2, respectively (Figure 3a).  
 104 Average per-trait PA was close to 1 for most traits in scenarios 1a and 1b (Figure 3b), and still high (around 0.75)  
 105 in scenario 2, when excluding **nbclu** and **vigour** (Table S3). Overall PA (over the 150 cross x trait combinations)  
 106 was 0.32. There was upward or downward bias for some traits, scenarios or methods, and in scenario 1a, LASSO  
 107 resulted in larger bias (Figure S5).



Across-population genomic prediction in grapevine

# 108 Prediction of Mendelian sampling

109 We then measured PA for individual offspring within each half-diallel cross, thus considering separately the  
 110 Mendelian sampling component. For each cross and trait, we compared the observed and predicted genotypic  
 111 values in the three scenarios (Figure 2; Figure S6)

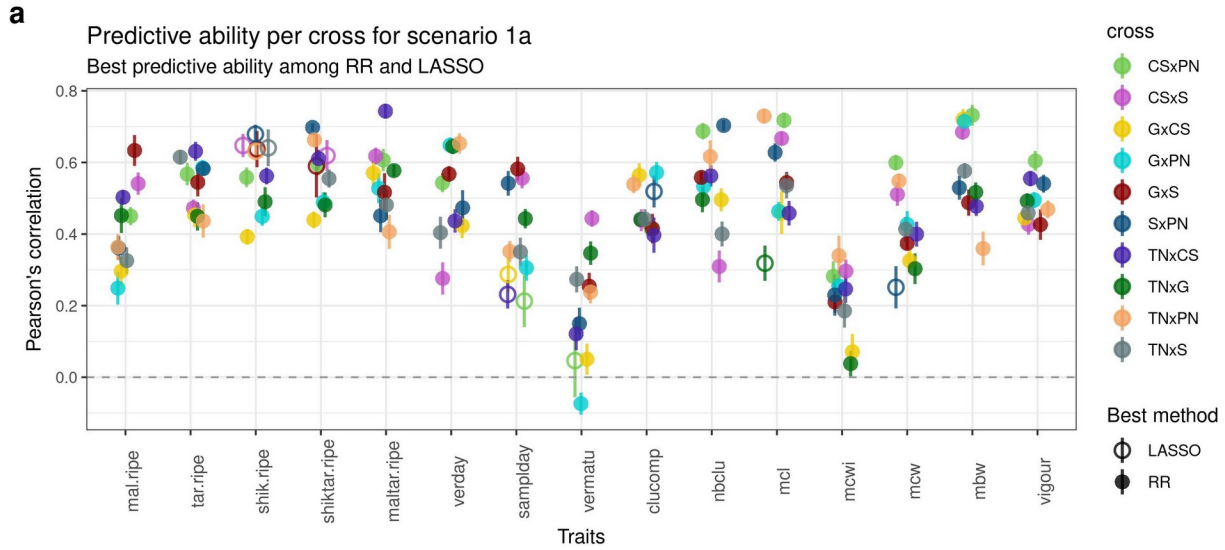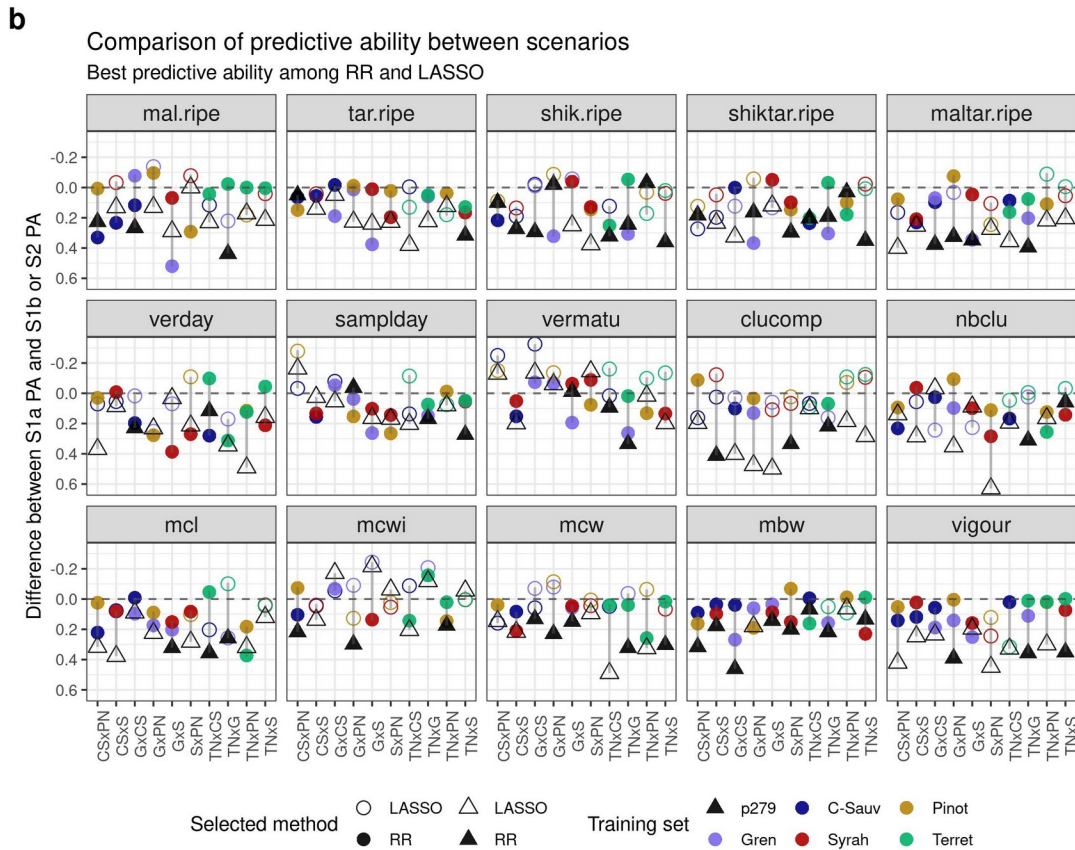

### Across-population genomic prediction in grapevine

113 Figure 4: a: Mendelian sampling PA per trait and cross for scenario 1a with the best method between RR and LASSO. Vertical bars represent the  
114 standard error around the mean (95 % of the confidence interval), based on the outer cross-validation replicates. PA corresponds to the  
115 Pearson's correlation between the BLUPs of the genotypic value and the predicted genotypic values.  
116 b: Difference between PA of scenario 1a and of the other scenarios. S2 is displayed with a triangle, and S1b by circles, colored according to the  
117 parental training set and filled if the best method was RR and empty otherwise.

118 In scenario 1a (Figure 4a), average PA per trait ranged from 0.18 for **vermatu** to 0.58 for **mbw**, with a 0.47  
119 overall average (Figure S7a). The extent of PA variation among crosses depended on the trait and could be very  
120 large, as for **vermatu** (from -0.074 to 0.443). Unlike for traits, no cross had constantly high or low PA (Figure  
121 S7b). RR method yielded the highest PA values in most cases (91% of the 150 trait x cross combinations).

122 In scenario 1b (Figure 4b), there were two PA values per cross, one for each parental training set (TS). The  
123 difference between these two values varied widely, depending on the cross and trait (up to about 0.5 for  
124 **mal.ripe** in GxS), with an overall average of 0.39. Most often, PA was lower in scenario 1b than in scenario 1a,  
125 likely because no full-sibs were included in the training set. However, there were several cases with PA values  
126 similar or higher in scenario 1b for one parental TS compared to scenario 1a. RR method produced the best PA  
127 in 61% of the 300 combinations (2 parents x 15 traits x 10 crosses).

128 In scenario 2 (Figure 4b), overall average PA (0.26) was nearly halved compared to scenario 1a, with trait  
129 dependent differences in PA between both scenarios. Some traits such as **vigour**, **clucomp** and **maltar.ripe**  
130 displayed a particularly marked decrease. On the opposite, **mcwi** and **vermatu** reached equivalent PA values in  
131 both scenarios. RR provided the best PA in 61% of the 150 combinations.

## 132 Exploring factors affecting predictive ability, and 133 training set optimization

134 We sought those variables affecting the PA values observed above, both for prediction of cross mean and  
135 Mendelian sampling. We then implemented training set (TS) optimization in an attempt to increase PA.

### 136 Variables affecting the prediction of cross mean

137 In scenario 2, per-cross PA was highly negatively correlated (-0.9) with the cross parents' pairwise distance on  
138 the first axis of the diversity panel PCA (Figure 5a, Figure S8a). Correlation with the additive relationship  
139 between parents was slightly lower (0.75) and non-significant at 5% (Figure S8a). No such strong correlation was  
140 found for per-cross PA in scenarios 1a or 1b (Figure S8a). The proportion of non-segregating markers showed  
141 low correlation with per-cross PA in all scenarios (Figure S8a).

142

143



Across-population genomic prediction in grapevine

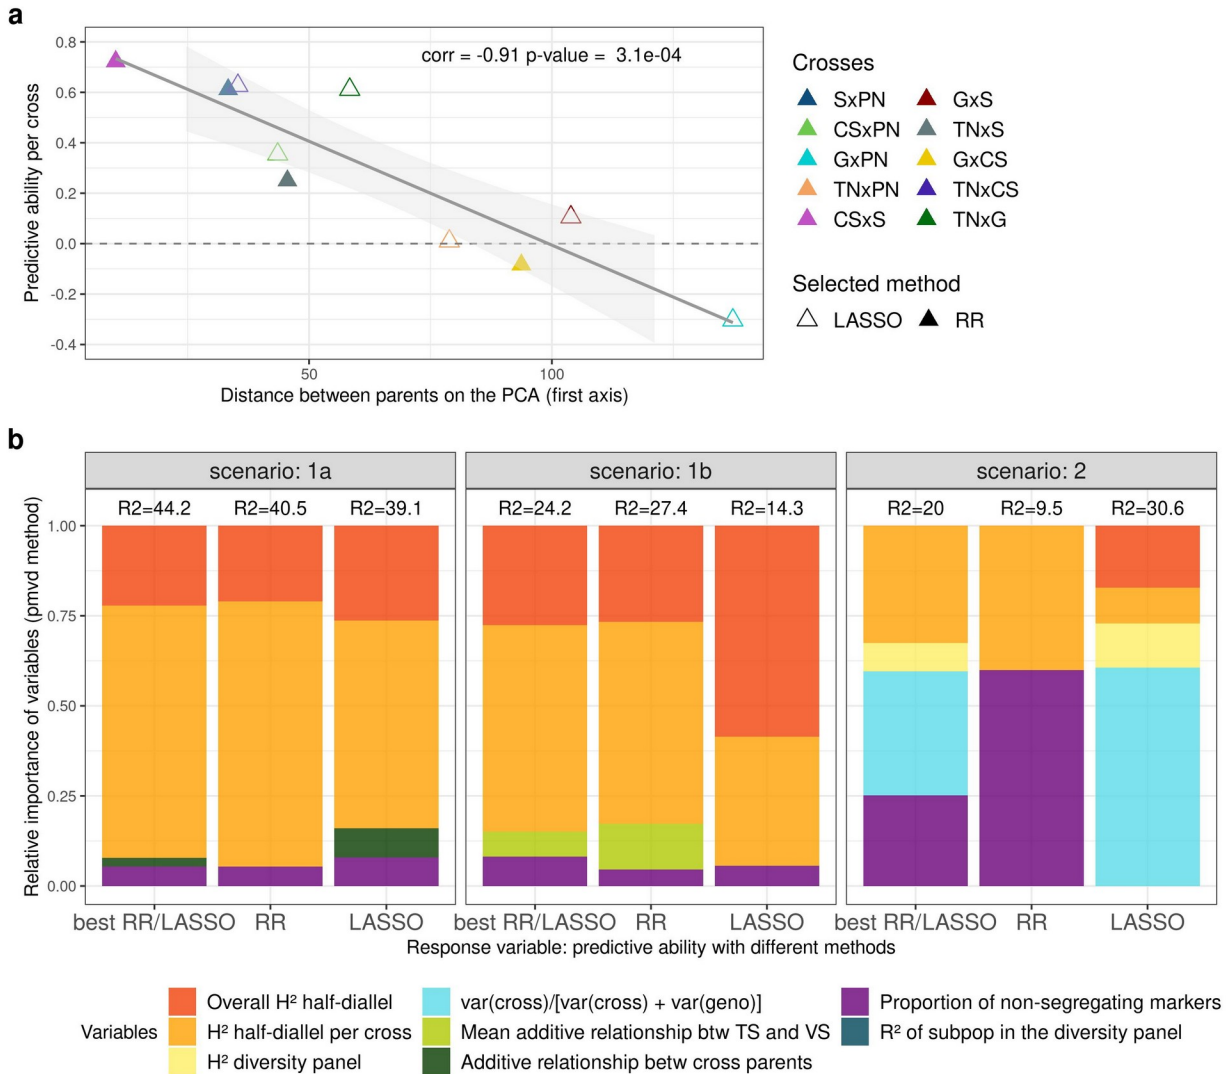

144

145 Figure 5: a: Plot of per-cross PA for cross mean in scenario 2, obtained with the best method between RR and LASSO for each cross, against the  
 146 distance between cross parents on the first axis of the diversity panel PCA (Figure 1a). Best method is indicated with the triangle filling and cross  
 147 with the color. b: Relative importance of variables affecting PA for Mendelian sampling in the three scenarios tested. Variables were selected  
 148 from an overall model, after a model selection step. Response individual PA values were obtained either as the best one between RR and  
 149 LASSO, with RR or with LASSO. Relative importance was estimated with pmvd method, from relaimpo R-package version 2.2-5.

150 Since variation in per-cross PA for scenario 2 was extremely large, from -0.3 for GxPN to 0.72 for CSxS (Figure  
 151 3a), we implemented TS optimization for each cross, to try and increase low PA values. Optimization actually  
 152 improved PA for crosses with PA initially below 0.6, for TS sizes between 50 and 150 (Figure 6). The largest  
 153 improvement, from -0.29 to 0.62, was observed for GxPN cross.

Across-population genomic prediction in grapevine

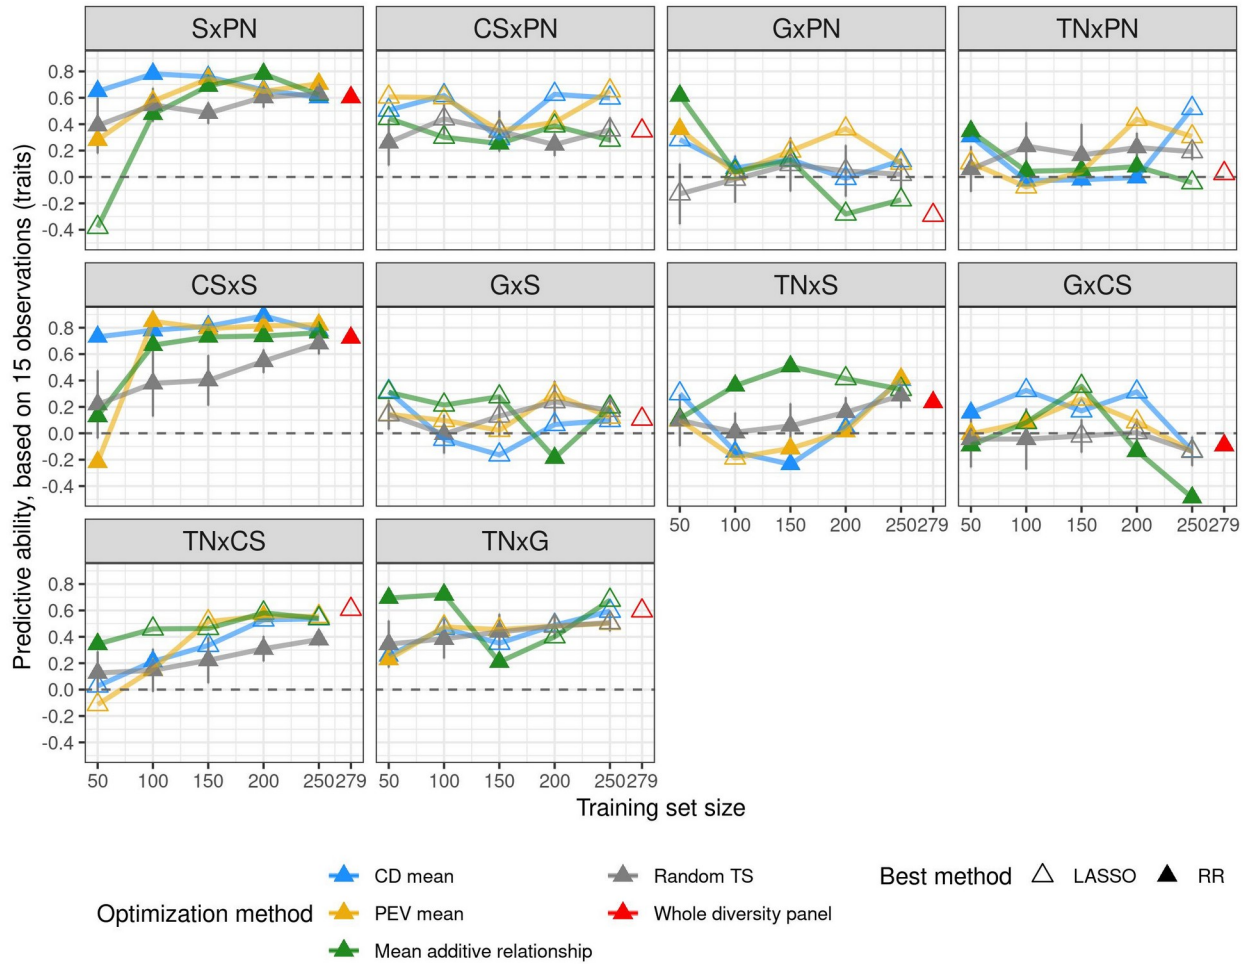

155 Figure 6: PA for cross mean prediction after training set optimization and with the best method between RR and LASSO, for each cross. Best  
 156 method is indicated with the triangle filling and TS optimization method with the color. For comparison, random selection of TS genotypes (in  
 157 grey) was performed and repeated ten times, error bars correspond to 95% of the confidence interval around the mean. We also report per-  
 158 cross PA with the whole diversity panel (in red), with a maximum TS size of 279 which may vary depending on traits.

159 The variable that most affected per-trait PA was the  $\sigma_C^2 / (\sigma_C^2 + \sigma_G^2)$  ratio (relative variance of cross effect). It was  
 160 strongly correlated with PA in scenarios 1a and 1b (0.82 and 0.88, respectively), but not in scenario 2 (Figure  
 161 S8b).

162 No other explanatory variable displayed any significant impact despite a fairly high correlation with per-trait or  
 163 per-cross PA, which could be due to low sample sizes (15 and 10 for per-trait and per-cross PA, respectively).

## 164 Factors affecting Mendelian sampling prediction

165 To model Mendelian sampling PA for each scenario and method selected for each trait (RR, LASSO or best), we  
 166 applied multiple linear regression on six to nine variables depending on the scenario, as detailed in Material and  
 167 Methods. The highest coefficient of determination (44.2%) was obtained in scenario 1a with the best method  
 168 (Figure 5b). Coefficients of determination were equivalent, lower and higher for LASSO compared to RR in  
 169 scenarios 1a, 1b and 2, respectively. Three variables were found to impact PA in all scenarios: half-diallel overall

170  $H^2$ , per-cross  $H^2$  and the proportion of non-segregating markers. Surprisingly, half-diallel overall  $H^2$  was not  
171 selected in scenario 2 with either RR or best method, while it had a strong effect in other modalities.

172 The selected variables were quite similar between scenarios 1a and 1b, with a high effect of half-diallel overall  
173 and per-cross  $H^2$ , but differed in scenario 2 in which more variables were selected. Overall, most of the relative  
174 importance came from variables related to the trait and not to the genetic composition of TS or validation set  
175 (VS).

176 We also calculated individual PA with optimized TSs derived from the diversity panel (Figure S9). However, we  
177 did not observe any improvement compared to using the whole diversity panel. This is consistent with the fact  
178 that genetic relationship seemed not to impact PA (Figure 5b).

## 179 Discussion

---

180 Our study allowed us to thoroughly explore GP potential in grapevine breeding, by scanning a large range of  
181 potentially useful configurations: (i) with 15 weakly related traits with variable levels of  $H^2$  and phenotypic  
182 structure (subpopulation or cross effects on phenotypic data) (Figure S4), (ii) in across-population scenarios with  
183 TS ranging from half-sibs (scenario 1b) to a diversity panel (scenario 2), (iii) with 10 balanced VS crosses.  
184 Moreover, we decomposed PA into cross mean and Mendelian sampling components, each being useful in  
185 breeding to select parental genotypes and offspring within crosses, respectively. All these results allowed us to  
186 get insight into main factors affecting PA. We will focus our discussion on prediction with the diversity panel as  
187 TS, since this is the most sought-after configuration in perennial species breeding.

### 188 Range of PA values

189 For the prediction of cross mean, overall PA was 0.32 in scenario 2, equivalent to the average per-cross PA  
190 (0.29), while the average per-trait PA was twice as high (0.6) (Figure 3). In other studies concerning other plant  
191 crops, the average per-cross PA was not reported <sup>5,6,7,8</sup>, probably because, in most cases, there were not  
192 enough traits to estimate it. Bernardo et al. <sup>5</sup> and Osthusenrich et al. <sup>6</sup> also reported a high-average per-trait  
193 PA, above 0.9, while Yamamoto et al. <sup>8</sup> reported PA values from 0.21 to 0.57 depending on the trait.

194 For the prediction of Mendelian sampling, overall average PA was slightly lower than overall PA for cross mean  
195 in scenario 2 (0.26 and 0.32, respectively). Yet, Mendelian sampling PA was still quite high, considering that TS  
196 was essentially unrelated to VS, i.e., with no first-degree relationship with predicted progenies. The same  
197 diversity panel was previously used in Flutre et al. <sup>26</sup> for predicting individual genotypic values of 23 additional  
198 Syrah x Grenache offspring. The reported PA for **mbw** was 0.56, whereas in the present study, we obtained 0.35  
199 in the Grenache x Syrah progeny (n=59). We further investigated such discrepancy, and found it related to a  
200 sampling bias due to the small VS size in Flutre et al. <sup>26</sup> (data not shown).

201 The range of average per-trait Mendelian sampling PA observed in scenario 2 (from 0.15 to 0.38) was consistent  
202 with those described on fruit perennial species where individual prediction was performed with a TS not directly  
203 related to the VS (neither half-sib nor full-sib). In *Coffea*, Ferrao et al. <sup>28</sup> reported differences in per-trait PA,  
204 from slightly negative values up to ca. 0.60. But, in this study, overall PA was calculated for all crosses of the VS,  
205 thus encompassing both cross mean and Mendelian sampling predictions, making comparison with our  
206 Mendelian sampling results alone impossible. In contrast, some studies in apple yielded within cross individual

*Across-population genomic prediction in grapevine*

207 PA values. For instance, Muranty et al. <sup>29</sup> reported average per-trait PA ranging from -0.14 to 0.37, and Roth et  
208 al. <sup>30</sup> found PA values from -0.29 to 0.72 for fruit texture, highly dependent on the cross for all traits. Conversely,  
209 our PA values were mainly stable over crosses and variable over traits, in the three scenarios (Figure S7). This  
210 difference might partly be due to the larger trait diversity we explored as compared to Roth et al. <sup>30</sup>, as  
211 suggested by comparing our Figure S4 with their Figure 1A. A complementary explanation could be that progeny  
212 size varied from 15 to 80 in Roth et al. <sup>30</sup>, while here progeny sizes were very close and thus less likely prone to  
213 sampling variability and to upward or downward bias.

214 Several factors may influence Mendelian sampling PA in our study compared to others. Among potential  
215 inflating factors, we can mention a slight over-representation of phenotyped individuals from the WW panel  
216 subpopulation, to which four out of the five parents of the half-diallel belong, leading to a higher genetic  
217 relationship between effective TS and VS. Factors potentially decreasing PA could be differences between TS  
218 and VS experimental designs since the diversity panel and the half-diallel were not phenotyped on the same  
219 years, had different plant management systems (overgrafting or simple grafting, respectively) and were planted  
220 a few kilometers apart. Nevertheless, for most studied traits, two years of phenotyping were used to compute  
221 genotypic BLUPs, which could at least compensate for differences between years, usually referred to as the  
222 millesime effect.

## 223 Variables affecting PA in across-population genomic 224 prediction

225 We focused on PA obtained with the best method between RR and LASSO, to take into account the part of  
226 variability among traits associated with genetic architecture. Indeed, LASSO is supposed to be better adapted to  
227 traits underlined by few QTLs, while RR would yield better PA for highly polygenic traits. However, we showed  
228 that for a given trait x cross combination, i.e., for a given genetic architecture, the best method selected  
229 changed depending on the scenario: LASSO was more often selected for scenario 2 than for scenario 1a, both  
230 for cross mean and individual prediction. This means that the best method choice also depends on the  
231 relationship between TS and VS. This was also suggested in cattle breeding by MacLeod et al. <sup>31</sup>, who found that  
232 BayesRC method (comparable to LASSO) yielded better results than GBLUP (comparable to RR) for across-  
233 population GP.

234 Regarding the other factors affecting PA, for cross mean prediction in scenario 2, no tested variable significantly  
235 affected per-trait PA. Conversely, per-cross PA was strongly affected by the genetic distance between parents  
236 (Figure 5a, Figure S8a). To our knowledge, such correlation has never been reported before, most probably  
237 because previous works investigated too few traits to afford per-cross PA calculation. We could hypothesize  
238 that when one parent is farthest from WW -the most represented panel subpopulation in TS- (e.g., Grenache,  
239 Figure 1a, Figure S1), marker effects for this parent might reflect different QTLs or allelic frequencies, compared  
240 to WW ones, thereby explaining the decrease in PA for crosses related to Grenache. Such differences underlying  
241 marker effects were already described in maize <sup>32</sup>. Simultaneously, some QTLs in this parent might be less  
242 genetically linked to causal polymorphisms due to more recombinations. However, this cannot be the only  
243 explanation for the large correlation of per-cross PA with pairwise parent distance, because the correlation  
244 between PA and genetic distance between TS and VS was much lower (Figure S8a).

245 For the prediction of Mendelian sampling, the variables explaining individual PA in scenario 2 were quite  
246 different from those explaining cross mean PA. Trait-related variables had a large impact on individual PA: half-

247 diallel overall and per-cross heritability, but also the relative variance of cross effect (Figure 5b). Surprisingly,  
248 genetic relationship between TS and VS had little to no impact on PA, although this factor has often been  
249 reported to affect PA <sup>17,15</sup>. Most studies reported separately the effects of different variables on individual PA.  
250 Riedelsheimer et al. <sup>33</sup> also performed multiple linear regression of individual PA on several factors to study their  
251 impact. They found that TS composition (number of crosses and their relationship with VS) explained most of  
252 the variance (41.7 %), followed by trait (27.6%) and VS composition (4.8%). The variance in genetic relationship  
253 between TS and VS may be smaller in our study.

## 254 Practical consequences on breeding programs

255 Across-population GP with model training in a diversity panel appeared to be promising in grapevine breeding  
256 for some traits and crosses, particularly for parent choice (Figure 3; Figure 4; Table S3; Figure S7).

257 The usefulness of GP for better selecting parents for future crosses can be at first assessed by the low overall  
258 correlation between mean parental genotypic values (BLUPs) and mean offspring BLUPs (0.28; see also Figure  
259 S10). This correlation was much lower than overall PA for cross mean in scenario 1b (0.66) and slightly lower  
260 than overall PA for cross mean in scenario 2 (0.32). In strawberry, Yamamoto et al. <sup>8</sup> also evidenced the interest  
261 of GP for predicting cross mean, with no additional benefit from including dominance effects into GP models,  
262 even if cross means were not equal to parental means. Moreover, in some cases, GP could provide other  
263 advantages over mean parental genetic values, for instance when parents are not phenotyped for some  
264 reasons, because too young or without representative phenotypes (e.g., using microvine <sup>34</sup>, in a new  
265 environment, etc). This was actually the case, in our half-diallel trial, for the Terret Noir parent, which suffered  
266 from mortality probably due to rootstock incompatibility and consequently had no phenotypic record for most  
267 studied traits.

268 Even though PA was quite high for some traits and crosses in scenario 2, on average it remained moderate both  
269 for cross mean and individual prediction. Both PAs were much higher in scenario 1a, due to increased  
270 relationship between training and validation sets. Nevertheless, such an extreme configuration is rarely used in  
271 plant breeding programs, especially in perennial species, because it requires to partly phenotype the cross to be  
272 predicted. An intermediate configuration, scenario 1b, could be implemented in breeding programs when PA  
273 from scenario 2 is not sufficient and half-sib families are available, because in this scenario, cross mean PA was  
274 similar as in scenario 1a and individual PA intermediate between scenarios 1a and 2.

275 We found TS optimization useful mostly for cross mean prediction for crosses with low PA. The advantage of TS  
276 optimization was less clear for individual prediction. This was consistent with the fact that genetic parameters  
277 more strongly affected cross mean PA than individual PA. In contrast, Roth et al. <sup>30</sup> observed in apple a  
278 systematic increase of individual PA with an optimized TS in the same context (i.e., with a diversity panel as TS  
279 and bi-parental families as VS, and common optimization methods). To our knowledge, only a single study  
280 tested TS optimization for cross mean prediction, by Heslot and Feoktistov <sup>35</sup>, who implemented optimization of  
281 parent selection for hybrid crossing in sunflower while selecting individuals to phenotype, but did not calculate  
282 cross mean PA.

283 Since our results show that prediction of cross mean can be quite accurate and useful in scenario 2, we decided  
284 to go one step further and implemented cross mean prediction for all 38,781 possible crosses between the 279  
285 genotypes of the diversity panel, based on parental average genotypes (Table S2) and on marker effects  
286 estimated with RR in this population. As predicted cross mean were biased for some traits in the ten half-diallel



### Across-population genomic prediction in grapevine

287 crosses (Figure S5), we estimated the bias for each trait from these data to correct the predicted mean in the  
288 possible diversity panel crosses. Figure S11 shows the large potential diversity to be explored through crossing  
289 in grape, for all the traits considered in the present study, illustrating the finding of Myles et al. <sup>36</sup> that genetic  
290 diversity in grapevine was largely unexploited. Such an example opens many prospects for the use of GP to  
291 design future crosses. Indeed, we limited here our prediction to the 279 panel genotypes representing the *Vitis*  
292 *vinifera* diversity, but potentially any other (unphenotyped) genotype of interest with dense genotypic data  
293 could be used for this purpose as exemplified with the half-diallel, since its five parents were not part of the  
294 diversity panel.

## 295 Prospects

296 Based on our results, the following improvements could be tested: i) increase SNP density <sup>25, 37</sup> and include  
297 structural variants ii) implement non-additive effects in GP models such as dominance or epistatic effects and iii)  
298 add crosses from other panel subpopulations as VSs. Indeed, since all our half-diallel crosses had at least one  
299 parent belonging to the WW subpopulation, it would be beneficial to include crosses with parents from the WE  
300 and TE subpopulations too. Specific GP models that include genetic structure in marker effect estimation <sup>38, 39</sup>  
301 could also be tested.

302 Predicting cross variance could also prove useful to design the offspring selection step, more specifically for  
303 choosing the number of offspring to test or produce for a given cross. Depending on the available funds and  
304 breeding program, a breeder may want to select crosses with high genetic variance, in order to maximize the  
305 probability to generate top-ranking genotypes. Conversely, choosing a cross with low variance could limit the  
306 risk of breeding poor genotypes.

## 307 Conclusion

308 We implemented GP in grapevine in a breeding context, i.e., across populations, on 15 traits, in ten related  
309 crosses, and obtained moderate to high PA values for some crosses and traits, thus showing GP usefulness in  
310 grapevine. Never before had genomic prediction been implemented for so many traits and crosses  
311 simultaneously in this species. We showed that per-cross PA was strongly correlated with the genetic distance  
312 between parents, whereas Mendelian sampling PA was largely determined by trait-related variables, such as  
313 heritability and the magnitude of the cross effect.

## 314 Material and Methods

---

### 315 Plant material

316 The half-diallel consists of 10 pseudo- $F_1$  bi-parental families obtained by crossing five *Vitis vinifera* cultivars:  
317 Cabernet-Sauvignon (CS), Pinot Noir (PN), Terret Noir (TN), Grenache (G) and Syrah (S) <sup>40</sup>. Each family comprised  
318 between 64 and 70 offspring, with a total of 676 individuals including parents.

319 The diversity panel consists of 279 cultivars selected as maximizing genetic diversity and minimizing kinship  
320 among cultivated grapevine. Grapevine genetic diversity is highly heterozygous and weakly structured into three  
321 subpopulations: WW (Wine West), WE (Wine East) and TE (Table East) <sup>27</sup>.



## 322 Field experiments

### 323 Field design

324 The half-diallel was created in 1998 at INRAE Montpellier, grafted on Richter 110, and planted in 2005, at the  
325 Institut Agro experimental vineyard "Le Chapitre" in Villeneuve-lès-Maguelone (Southern France). The progenies  
326 were planted in two randomized complete blocks, with plots of two consecutive plants per offspring per block.

327 The field design for the diversity panel was previously described in Flutre et al. <sup>26</sup>. Briefly, cultivars were  
328 overgrafted on 6-year-old Marselan in 2009, itself originally grafted on Fercal rootstock, a few kilometers away  
329 from the diversity panel. They were planted in five randomized complete blocks, with one plant per cultivar per  
330 block.

### 331 Phenotyping

332 We studied 15 traits in both trials: berry composition with malic (**mal.ripe**), tartaric (**tar.ripe**) and shikimic acid  
333 (**shik.ripe**) concentrations in  $\mu_{eq} \cdot L^{-1}$  measured at ripe stage (20° Brix) (according to Rienth et al. <sup>41</sup>), from which  
334 two ratios were derived, shikimic / tartaric acid (**shiktar.ripe**) and malic / tartaric acid (**maltar.ripe**);  
335 morphological traits with mean berry weight (**mbw**, in g) measured on 100 random berries, mean cluster weight  
336 (**mcw**, in g), mean cluster length (**mcl**, in cm) and mean cluster width (**mcwi**, in cm), measured on 3 clusters,  
337 number of clusters (**nbclu**) and cluster compactness (**clucomp**) measured on the OIV semi-quantitative scale;  
338 phenology traits with veraison date (onset of ripening; **verday**, in days since January 1st), maturity date  
339 corresponding to berries reaching 20° Brix (**samplday**, in days since January 1st) and the interval between  
340 veraison and maturity (**vermatu**, in days); vigour (**vigour**, in kg), derived as the ratio between pruning weight  
341 and the number of canes. Phenotypic data were collected between 2013 and 2017 for the half-diallel and in  
342 2011-2012 for the diversity panel. There was a slight over-representation of phenotypes from the WW  
343 subpopulation because of fertility issues in WE and TE subpopulations

## 344 SNP genotyping

345 For the half-diallel, we used genotyping-by-sequencing (GBS) SNP markers derived by Tello et al. <sup>40</sup>, 622 of the  
346 676 individuals being successfully genotyped, as well as the five parents. Raw GBS data were processed  
347 separately for each cross, and then markers from all crosses were merged together (390,722 SNPs), thus  
348 generating many missing data (85% of missing data per marker on average), since all markers did not segregate  
349 in all progenies. Markers with more than 80% of missing data were removed and remaining markers were  
350 imputed with FImpute3 <sup>42</sup> (86,017 SNPs). Some parental cultivars were used either as female or male, depending  
351 on the cross, a configuration not allowed by FImpute3. We thus declared only a partial pedigree maximizing the  
352 number of crosses defined with both parents (Table S4). For the diversity panel, we used the same SNP markers  
353 as in Flutre et al. <sup>26</sup>, except that we applied a filter on minor allelic frequency (5%) and no filter on linkage  
354 disequilibrium, which yielded 83,264 SNPs.

355 Finally, we only retained the 32,894 SNPs common to both populations.

## 356 Phenotypic data analyses

### 357 Half-diallel

- 358 • Statistical modeling for estimating genotypic values

Across-population genomic prediction in grapevine

359 For each trait, we excluded outlier values by visual inspection of raw phenotypic data and computed a log or  
 360 square-root transformation if its distribution looked skewed. Then, we fitted the following linear mixed full  
 361 model by Maximum Likelihood:

$$362 \quad y_{ijkl} = \mu + G_i + C_j + B_k + Y_l + (B:Y)_{kl} + (G:Y)_{il} + (C:Y)_{jl} + x + y + x:y + (x:Y)_l + (y:Y)_l + \epsilon_{ijkl}$$

363 with  $y_{ijkl}$  the phenotype of genotype  $i$  from cross  $j$  in block  $k$  and year  $l$ . Among the fixed terms,  $\mu$  was the  
 364 overall mean, and  $B_k$  and  $Y_l$  the effects of block  $k$  and year  $l$ . Among the random terms,  $G_i$  and  $C_j$  were the  
 365 effects of genotype  $i$  nested within cross  $j$ , and  $x$  and  $y$  the field coordinates. Interactions are indicated with ":".  
 366  $\epsilon_{ijkl}$  was the random residual term, assumed to be normally distributed.

367 Sub-model selection was based on Fisher tests for fixed effects and log-likelihood ratio tests for random effects.  
 368 It was performed with the step function from lmerTest R-package<sup>43</sup>. Variance components were estimated after  
 369 re-fitting the selected model by Restricted Maximum Likelihood, and diagnostic plots were drawn to visually  
 370 check the acceptability of model hypotheses such as homoscedasticity or normality. Best Linear Unbiased  
 371 Predictors (BLUPs) of cross (C) and genotype (G) values were computed. For genomic predictions, we used their  
 372 sum (C+G) as total genotypic values for both training and validation data. Variance component estimates were  
 373 used to compute the proportion of genetic variance due to differences between crosses as:  $\sigma_C^2 / (\sigma_C^2 + \sigma_G^2)$ .

374 • **Heritability estimation**

375 We estimated overall (for the whole half-diallel) broad-sense heritability for genotype-entry means<sup>44</sup> as:

$$376 \quad H^2 = \frac{\sigma_C^2 + \sigma_G^2}{\sigma_C^2 + \sigma_G^2 + \frac{\sigma_{C:Y}^2 + \sigma_{G:Y}^2 + \sigma_{x:Y}^2 + \sigma_{y:Y}^2}{n_{year}} + \frac{\sigma_x^2 + \sigma_y^2 + \sigma_{x:y}^2 + \sigma_\epsilon^2}{n_{year} \times n_{rep. year}}}$$

377 with genotype (G) and cross (C) variances at the numerator. Random variance components involving year (Y)  
 378 were divided by the mean number of years ( $n_{year}$ ). Other random variance components involving spatial effects  
 379 or residuals were divided by the mean number of years times the mean number of replicates per year ( $n_{rep. year}$ ).

380 We also estimated broad-sense heritability per cross (thereafter used to name half-diallel full-sib family). For  
 381 that, we applied the same selected model, but removed all effects involving cross. Then, we estimated variance  
 382 components within each cross, and heritability with the same formula, after removing variances involving cross.

383 All information on analyses of phenotypic data and heritability of the half-diallel is detailed in Table S1.

384 **Diversity panel**

385 We used the genotypic values previously estimated in Flutre et al.<sup>26</sup> with a similar statistical procedure to the  
 386 one described above for the half-diallel. All phenotypic analysis information is provided in Table S3 of Flutre et  
 387 al.<sup>26</sup>.

388 For each of the two populations, genotypic BLUPs were scaled, allowing comparison among traits.

## 389 Genomic prediction statistical methods

390 Marker effects were estimated using two methods to take into account varying genetic architecture among the  
391 traits studied. Ridge regression (RR) <sup>45</sup>, best adapted to many minor QTLs, shrinks marker effects towards 0.  
392 Least Absolute Shrinkage and Selection Operator (LASSO) <sup>46</sup>, best adapted to a few major QTLs, applies a L1  
393 norm on allelic effects, thus forcing some to be exactly 0. Both methods were implemented with R/glmnet  
394 package <sup>47</sup> and the amount of shrinkage, controlled by  $\lambda$  parameter, was calibrated by five-fold inner cross-  
395 validation within each training set, using cv.glmnet function.

## 396 Genomic prediction scenarios

397 We assessed prediction within half-diallel crosses under three different training scenarios (Figure 2; Table S5):

- 398 • **Scenario 1a:** whole half-diallel prediction. We applied random outer 10-fold cross-validation over the  
399 whole half-diallel population. In each fold, 90% of the phenotyped offspring were used as the training  
400 set (TS) and the remaining 10% as the validation set (VS). Cross-validation was replicated ten times.
- 401 • **Scenario 1b:** half-sib prediction. For each half-diallel cross used as VS, we trained the model with the  
402 three half-sib crosses of each parent in turn, thus predicting each cross twice.
- 403 • **Scenario 2:** across-population prediction. We used the whole diversity panel as TS and each half-diallel  
404 cross as VS.

## 405 Predictive ability assessment

406 In order to account for the effect of genetic architecture, we applied both RR and LASSO methods for each trait  
407 and cross and kept the best PA, for both cross mean and within cross individual prediction.

## 408 Prediction of cross mean

409 Cross mean PA was assessed as Pearson's correlation between the average value of observed total genotypic  
410 values (sum of genotype and cross BLUPs for each offspring) for each cross, and the mean predicted genotypic  
411 value per cross, calculated in two ways, as:

- 412 • average predicted value over all offspring of the cross. In scenario 1a, each offspring was predicted 10  
413 times, thus we also averaged the predicted value over the 10 replicates.
- 414 • predicted value for the parental average genotype, defined at each locus and for each cross as the  
415 mean allelic dosage according to the expected segregation pattern based on parents' genotypes (Table  
416 S2).
- 417 • genotypic values predicted with these two modalities were highly correlated (above 0.98) in the three  
418 scenarios and for the two methods (partly shown in Figure S12). Therefore, in subsequent analyses, we  
419 used only prediction with parental average genotypes.

420 Pearson's correlation between observed and predicted values was calculated on all cross x trait combinations  
421 (overall PA), for each trait (per-trait PA) and for each cross (per-cross PA).

## 422 Within-cross individual prediction

423 We measured PA within each cross in each scenario as Pearson's correlation between observed total genotypic  
424 values and predicted genotypic values.

## 425 Test of variables affecting predictive ability

426 We tested the effect of several variables on within-cross individual PA, in each scenario. We built a multiple  
427 linear regression model with PA per trait x cross combination as the response variable and as predictors, a set of  
428 variables common to all three scenarios plus specific variables for scenarios 1b and 2. Common variables were:  
429 the proportion of non-segregating markers in the cross, overall and per-cross broad-sense heritability, the  
430 distance between the parents of the cross measured either as the additive relationship or as the distance on the  
431 first or first two axes of the panel PCA (Figure 1a) and the proportion of genetic variance due to differences  
432 between crosses ( $\sigma_C^2 / (\sigma_C^2 + \sigma_G^2)$  ratio). A specific variable for scenarios 1b and 2 was the mean additive  
433 relationship between training and validation sets. In scenario 2, it was calculated for each trait only with  
434 phenotyped individuals. Specific variables for scenario 2 were: broad-sense heritability in the diversity panel  
435 (retrieved from Flutre et al. <sup>26</sup> and Table S1) and the percentage of trait variance explained by the subpopulation  
436 factor (see below). After fitting the overall model, we applied a forward-backward stepwise regression, with the  
437 AIC criterion to select the best explanatory model. Then, we estimated the relative importance of each variable  
438 selected in this model with the pmvd method <sup>48</sup>, which allows to decompose the  $R^2$  of correlated regressors  
439 with the R-package relaimpo <sup>49</sup>.

440 The percentage of trait variance within the diversity panel explained by subpopulation (WW, WE or TE) was  
441 evaluated by fitting for each trait the following linear model:  $G = P + \epsilon$ , where  $G$  is the genotypic (BLUP) value  
442 within the diversity panel,  $P$  is a fixed subpopulation effect, and  $\epsilon$  a random residual term. The percentage of  
443 variance due to differences between subpopulations was then estimated as the coefficient of determination ( $R^2$ )  
444 of the model.

## 445 Training set optimization

446 We tested three methods for optimizing TS in scenario 2, for both cross mean and within-cross individual  
447 prediction. We used the STPGA R-package<sup>50</sup> to implement Prediction Error Variance (*PEVmean*) and *CDmean*  
448 (based on the coefficient of determination)<sup>10</sup>. Moreover, we computed the mean relationship criterion  
449 (*MeanRel*), as the mean additive relationship between each genotype in TS and all genotypes in VS. Each  
450 optimized TS was specific to a cross. The realized additive relationship based on marker data was estimated  
451 using the rrBLUP R-package<sup>51</sup> with the A.mat function implementing the formula from VanRaden et al. <sup>52</sup>. For  
452 each of these three optimization methods, we tested five TS sizes (50, 100, 150, 200, 250). PA values obtained  
453 with each optimized TS were compared with those obtained with a random sample of genotypes of the same  
454 size, repeated 10 times.

## 455 Data availability

456 All analyses were conducted using free and open-source software, mostly R. Phenotypic and genotypic data, R  
457 scripts and result tables are available at <https://data.inrae.fr/privateurl.xhtml?token=1925c973-a11b-45ad-b297-69db8ec2c270>.

## 459 Acknowledgments

460 We thank Charles Romieu for his help on the acquisition of phenotypic data as well as Philippe Châtelet and  
461 Morgane Roth for their suggestions on the text. This work has been realized with the support of the  
462 SouthGreen platform and MESO@LR-Platform at the University of Montpellier.

## 463 Author contribution statement

464 VS, AD, PT, TF, JPP and LLC conceived the idea of the study and contributed to funding acquisition; TP, PF, AD  
465 and JPP obtained the phenotypic data used in this work; VS, AD, PT, LLC, TF and CB performed and interpreted  
466 results; AD conceived the half-diallel population; PT is the PhD supervisor of CB; CB wrote the original draft,  
467 which was reviewed and edited by all authors. All authors read and approved the final manuscript.

## 468 Funding

469 Partial funding of the PhD was provided by ANRT (grant number 2018/0577), IFV and Inter-Rhône. The authors  
470 declare that they have no conflict of interest. The authors declare that the experiments comply with the current  
471 laws of the country in which they were carried out.

472

## 473 Bibliography

474

- 475 1. Meuwissen, T. H. E., Hayes, B. J. & Goddard, M. E. Prediction of Total Genetic Value Using Genome-Wide Dense Marker  
476 Maps. *Genetics* **11** (2001).
- 477 2. Heffner, E. L., Sorrells, M. E. & Jannink, J.-L. Genomic Selection for Crop Improvement. *Crop Science* **49**, 1 (2009).
- 478 3. Werner, C. R. *et al.* How Population Structure Impacts Genomic Selection Accuracy in Cross-Validation: Implications for  
479 Practical Breeding. *Frontiers in Plant Science* **11**, 592977 (2020).
- 480 4. Falconer, D. S. & Mackay, T. F. C. *Introduction to quantitative genetics*. (Pearson, Prentice Hall, 2009).
- 481 5. Bernardo, R. Genomewide Selection of Parental Inbreds: Classes of Loci and Virtual Biparental Populations. *Crop Science* **54**,  
482 2586–2595 (2014).
- 483 6. Osthusenrich, T., Frisch, M. & Herzog, E. Genomic selection of crossing partners on basis of the expected mean and  
484 variance of their derived lines. *PLOS ONE* **12**, e0188839 (2017).
- 485 7. Imai, A. *et al.* Predicting segregation of multiple fruit-quality traits by using accumulated phenotypic records in citrus  
486 breeding. *PLOS ONE* **13**, e0202341 (2018).
- 487 8. Yamamoto, E., Kataoka, S., Shirasawa, K., Noguchi, Y. & Isobe, S. Genomic Selection for F1 Hybrid Breeding in Strawberry  
488 (*Fragaria × ananassa*). *Frontiers in Plant Science* **12**, (2021).
- 489 9. Heslot, N., Yang, H.-P., Sorrells, M. E. & Jannink, J.-L. Genomic Selection in Plant Breeding: A Comparison of Models. *Crop*  
490 *Science* **52**, 146–160 (2012).
- 491 10. Rincent, R. *et al.* Maximizing the Reliability of Genomic Selection by Optimizing the Calibration Set of Reference Individuals:  
492 Comparison of Methods in Two Diverse Groups of Maize Inbreds (*Zea mays* L.). *Genetics* **192**, 715–728 (2012).
- 493 11. Charmet, G. *et al.* Genome-wide prediction of three important traits in bread wheat. *Molecular Breeding* **34**, 1843–1852  
494 (2014).
- 495 12. Riedelsheimer, C., Technow, F. & Melchinger, A. E. Comparison of whole-genome prediction models for traits with  
496 contrasting genetic architecture in a diversity panel of maize inbred lines. *BMC Genomics* **13**, 452 (2012).
- 497 13. Ornella, L. *et al.* Genomic Prediction of Genetic Values for Resistance to Wheat Rusts. *The Plant Genome* **5**, (2012).

Across-population genomic prediction in grapevine

- 498 14. Heffner, E. L., Jannink, J.-L. & Sorrells, M. E. Genomic Selection Accuracy using Multifamily Prediction Models in a Wheat  
499 Breeding Program. *The Plant Genome* **4**, 65–75 (2011).
- 500 15. Lund, M. S., Su, G., Janss, L., Guldbrandtsen, B. & Brøndum, R. F. Genomic evaluation of cattle in a multi-breed context.  
501 *Livestock Science* **166**, 101–110 (2014).
- 502 16. Hayes, B. J., Bowman, P. J., Chamberlain, A. C., Verbyla, K. & Goddard, M. E. Accuracy of genomic breeding values in multi-  
503 breed dairy cattle populations. *Genetics Selection Evolution* **41**, 51 (2009).
- 504 17. de Roos, A. P. W., Hayes, B. J. & Goddard, M. E. Reliability of Genomic Predictions Across Multiple Populations. *Genetics*  
505 **183**, 1545–1553 (2009).
- 506 18. Rio, S. *et al.* Disentangling group specific QTL allele effects from genetic background epistasis using admixed individuals in  
507 GWAS: An application to maize flowering. *PLOS Genetics* **16**, e1008241 (2020).
- 508 19. Wientjes, Y. C. *et al.* Empirical and deterministic accuracies of across-population genomic prediction. *Genetics Selection*  
509 *Evolution* **47**, 5 (2015).
- 510 20. Schopp, P., Müller, D., Wientjes, Y. C. J. & Melchinger, A. E. Genomic Prediction Within and Across Biparental Families:  
511 Means and Variances of Prediction Accuracy and Usefulness of Deterministic Equations. *G3: Genes, Genomes, Genetics* **7**, 3571–3586  
512 (2017).
- 513 21. Raymond, B., Wientjes, Y. C. J., Bouwman, A. C., Schrooten, C. & Veerkamp, R. F. A deterministic equation to predict the  
514 accuracy of multi-population genomic prediction with multiple genomic relationship matrices. *Genetics Selection Evolution* **52**, 21  
515 (2020).
- 516 22. Viana, A. P., Resende, M. D. V. de, Riaz, S. & Walker, M. A. Genome selection in fruit breeding: application to table grapes.  
517 *Scientia Agricola* **73**, 142–149 (2016).
- 518 23. Migicovsky, Z. *et al.* Patterns of genomic and phenomic diversity in wine and table grapes. *Horticulture Research* **4**, 17035  
519 (2017).
- 520 24. Brault, C. *et al.* Harnessing multivariate, penalized regression methods for genomic prediction and QTL detection to cope  
521 with climate change affecting grapevine. *bioRxiv* 2020.10.26.355420 (2020) doi:10.1101/2020.10.26.355420.
- 522 25. Fodor, A. *et al.* Genome-Wide Prediction Methods in Highly Diverse and Heterozygous Species: Proof-of-Concept through  
523 Simulation in Grapevine. *PLoS ONE* **9**, e110436 (2014).
- 524 26. Flutre, T. *et al.* Genome-wide association and prediction studies using a grapevine diversity panel give insights into the  
525 genetic architecture of several traits of interest. *bioRxiv* 2020.09.10.290890 (2020) doi:10.1101/2020.09.10.290890.
- 526 27. Nicolas, S. D. *et al.* Genetic diversity, linkage disequilibrium and power of a large grapevine (*Vitis vinifera* L) diversity panel  
527 newly designed for association studies. *BMC Plant Biol* **16**, 74 (2016).
- 528 28. Ferrão, L. F. V. *et al.* Accurate genomic prediction of *Coffea canephora* in multiple environments using whole-genome  
529 statistical models. *Heredity* **122**, 261–275 (2019).
- 530 29. Muranty, H. *et al.* Accuracy and responses of genomic selection on key traits in apple breeding. *Horticulture Research* **2**,  
531 (2015).
- 532 30. Roth, M. *et al.* Genomic prediction of fruit texture and training population optimization towards the application of genomic  
533 selection in apple. *Horticulture Research* **7**, 148 (2020).
- 534 31. MacLeod, I. M. *et al.* Exploiting biological priors and sequence variants enhances QTL discovery and genomic prediction of  
535 complex traits. *BMC Genomics* **17**, 144 (2016).



*Across-population genomic prediction in grapevine*

- 536 32. Rio, S., Mary-Huard, T., Moreau, L. & Charcosset, A. Genomic selection efficiency and a priori estimation of accuracy in a  
537 structured dent maize panel. *TAG. Theoretical and applied genetics. Theoretische und angewandte Genetik* **132**, 81–96 (2019).
- 538 33. Riedelsheimer, C. *et al.* Genomic Predictability of Interconnected Biparental Maize Populations. *Genetics* **194**, 493–503  
539 (2013).
- 540 34. Chaïb, J. *et al.* The grape microvine – a model system for rapid forward and reverse genetics of grapevines. *The Plant*  
541 *Journal* **62**, 1083–1092 (2010).
- 542 35. Heslot, N. & Feoktistov, V. Optimization of Selective Phenotyping and Population Design for Genomic Prediction. *Journal of*  
543 *Agricultural, Biological and Environmental Statistics* **25**, 579–600 (2020).
- 544 36. Myles, S. *et al.* Genetic structure and domestication history of the grape. *Proceedings of the National Academy of Sciences*  
545 **108**, 3530–3535 (2011).
- 546 37. Dai, Z., Long, N. & Huang, W. Influence of Genetic Interactions on Polygenic Prediction. *G3 GenesGenomesGenetics* **10**, 109–  
547 115 (2020).
- 548 38. Heslot, N. & Jannink, J.-L. An alternative covariance estimator to investigate genetic heterogeneity in populations. *Genetics*  
549 *Selection Evolution* **47**, 93 (2015).
- 550 39. Ramstein, G. P. & Casler, M. D. Extensions of BLUP Models for Genomic Prediction in Heterogeneous Populations:  
551 Application in a Diverse Switchgrass Sample. *G3 GenesGenomesGenetics* **9**, 789–805 (2019).
- 552 40. Tello, J. *et al.* A novel high-density grapevine (*Vitis vinifera* L.) integrated linkage map using GBS in a half-diallel population.  
553 *Theoretical and Applied Genetics* **132**, 2237–2252 (2019).
- 554 41. Rienth, M. *et al.* Temperature desynchronizes sugar and organic acid metabolism in ripening grapevine fruits and remodels  
555 their transcriptome. *BMC Plant Biology* **16**, 164 (2016).
- 556 42. Sargolzaei, M., Chesnais, J. P. & Schenkel, F. S. A new approach for efficient genotype imputation using information from  
557 relatives. *BMC Genomics* **15**, 478 (2014).
- 558 43. Bates, D., Mächler, M., Bolker, B. & Walker, S. Fitting Linear Mixed-Effects Models using lme4. *arXiv:1406.5823 [stat]* (2014).
- 559 44. Piepho, H.-P. & Möhring, J. Computing Heritability and Selection Response From Unbalanced Plant Breeding Trials. *Genetics*  
560 **177**, 1881–1888 (2007).
- 561 45. Hoerl, A. E. & Kennard, R. W. Ridge Regression: Biased Estimation for Nonorthogonal Problems. *Technometrics* **12**, 55–67  
562 (1970).
- 563 46. Tibshirani, R. Regression Shrinkage and Selection via the Lasso. *Journal of the Royal Statistical Society. Series B*  
564 *(Methodological)* **58**, 267–288 (1996).
- 565 47. Hastie, T. & Qian, J. *Glmnet vignette*. (2016).
- 566 48. Feldman, B. E. *Relative Importance and Value*. <https://papers.ssrn.com/abstract=2255827> (2005)  
567 doi:10.2139/ssrn.2255827.
- 568 49. Groemping, U. Relative Importance for Linear Regression in R: The Package relaimpo. *Journal of Statistical Software* **17**, 1–  
569 27 (2006).
- 570 50. Akdemir, D. STPGA. (2018).
- 571 51. Endelman, J. B. Ridge Regression and Other Kernels for Genomic Selection with R Package rrBLUP. *The Plant Genome* **4**,  
572 (2011).
- 573 52. VanRaden, P. M. Efficient Methods to Compute Genomic Predictions. *Journal of Dairy Science* **91**, 4414–4423 (2008).

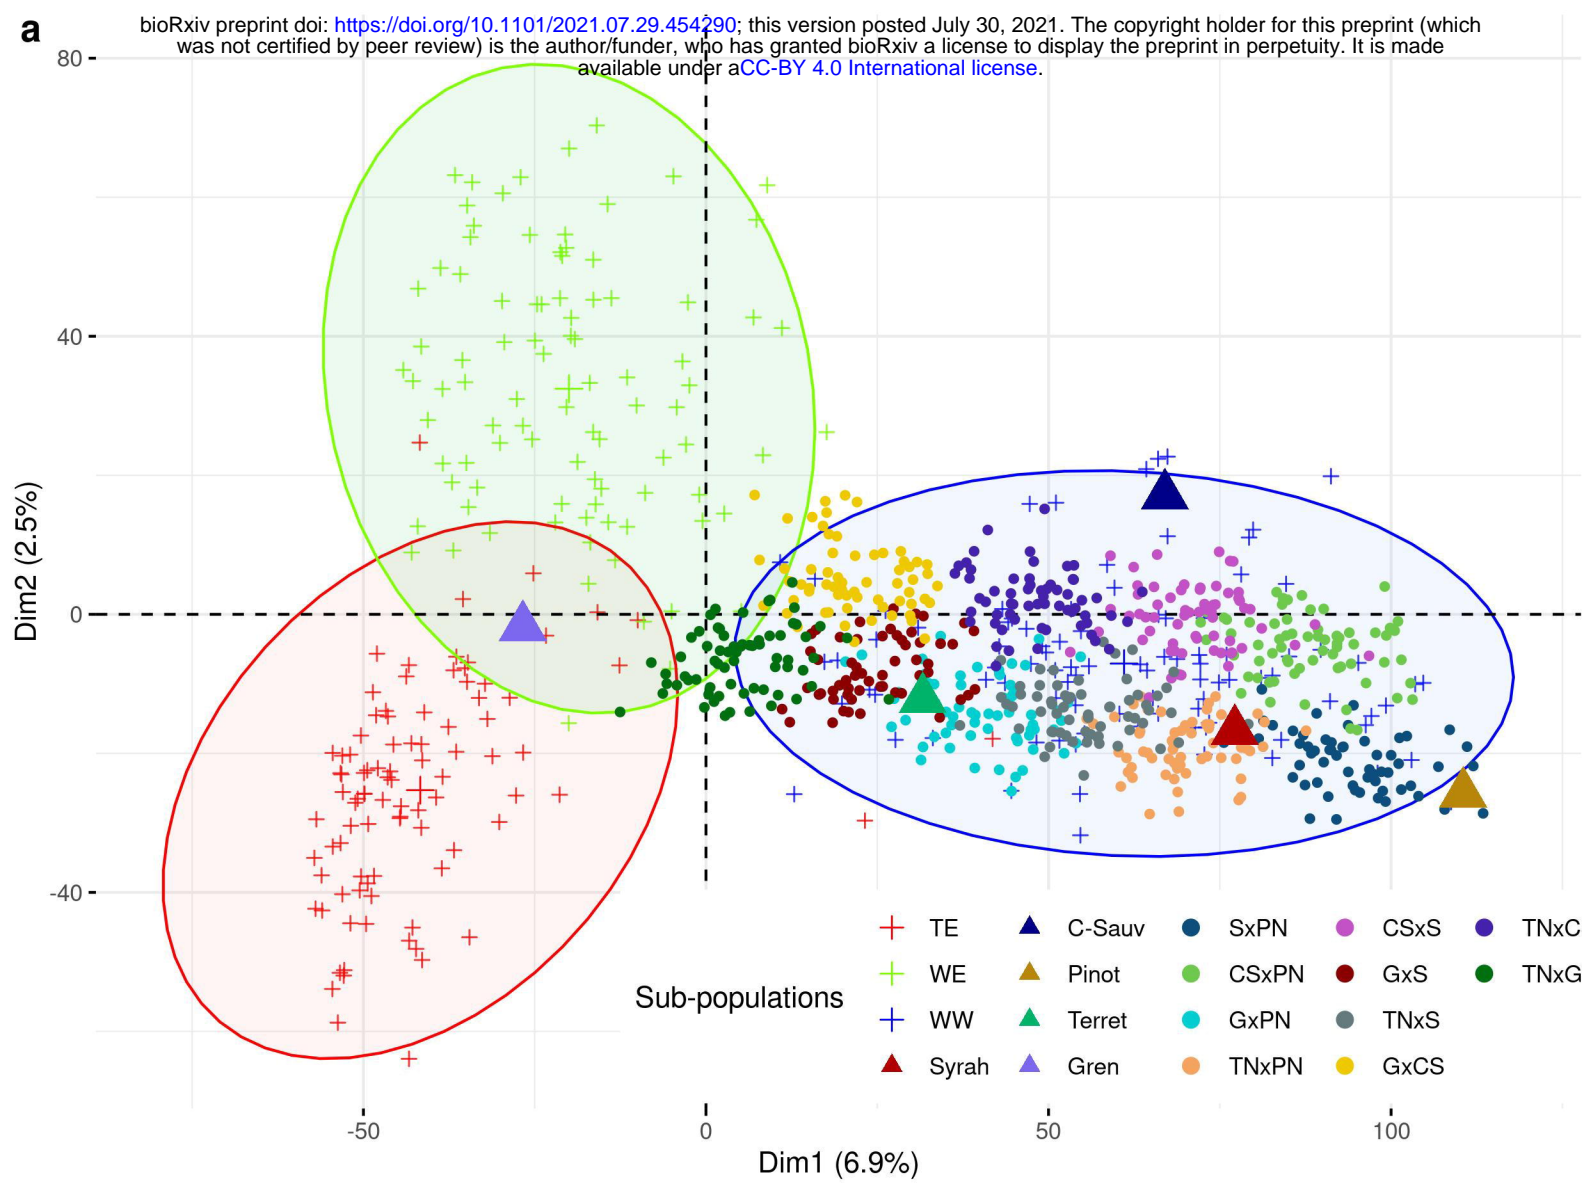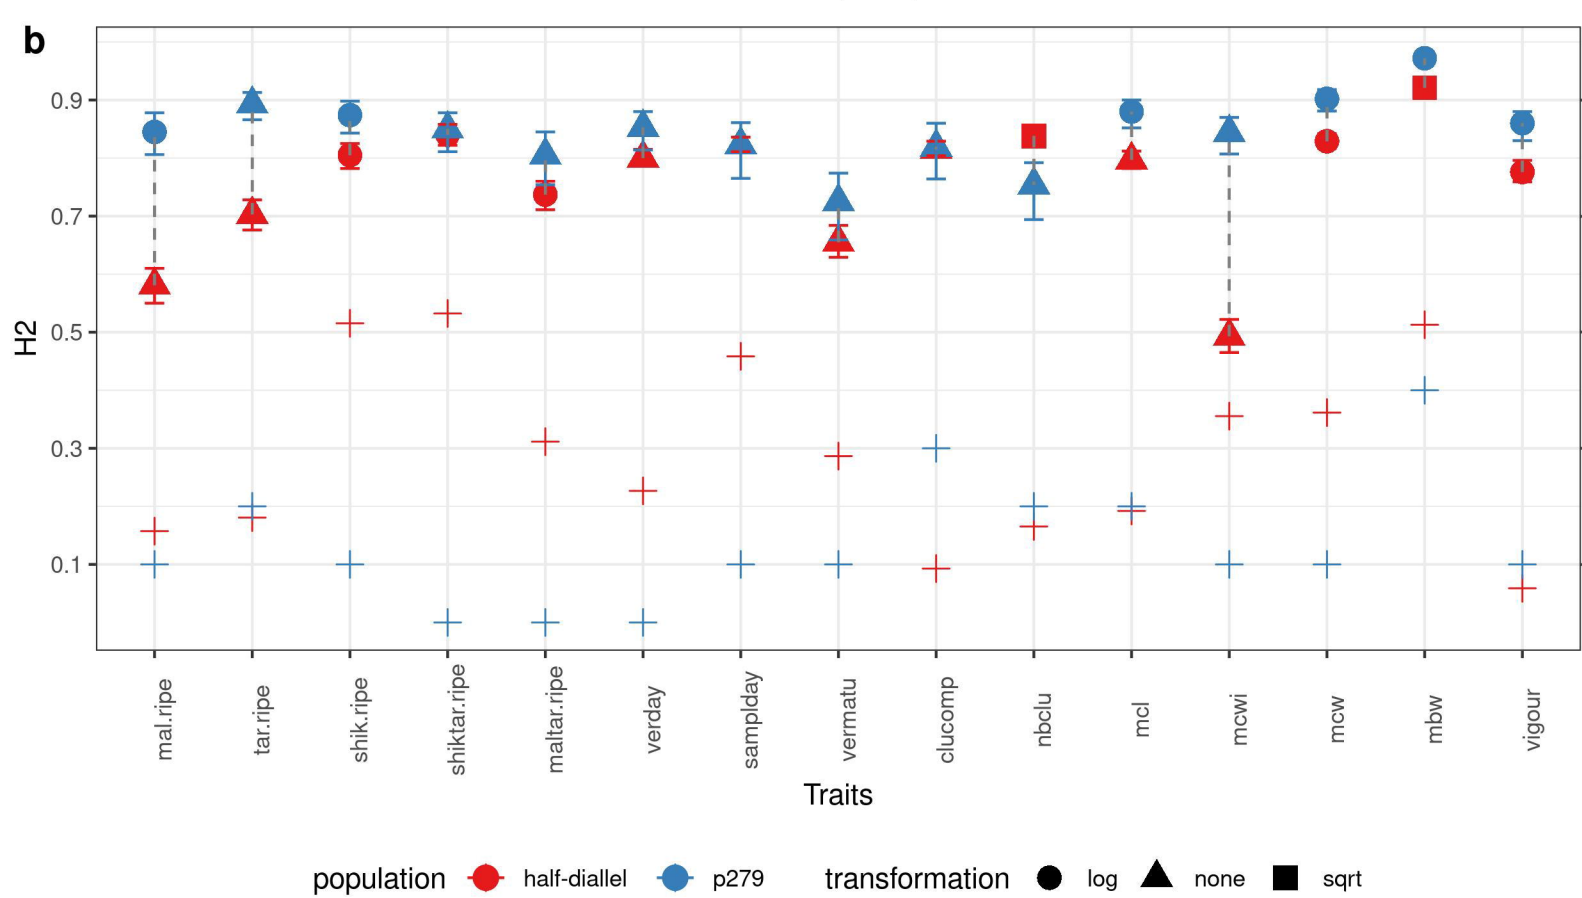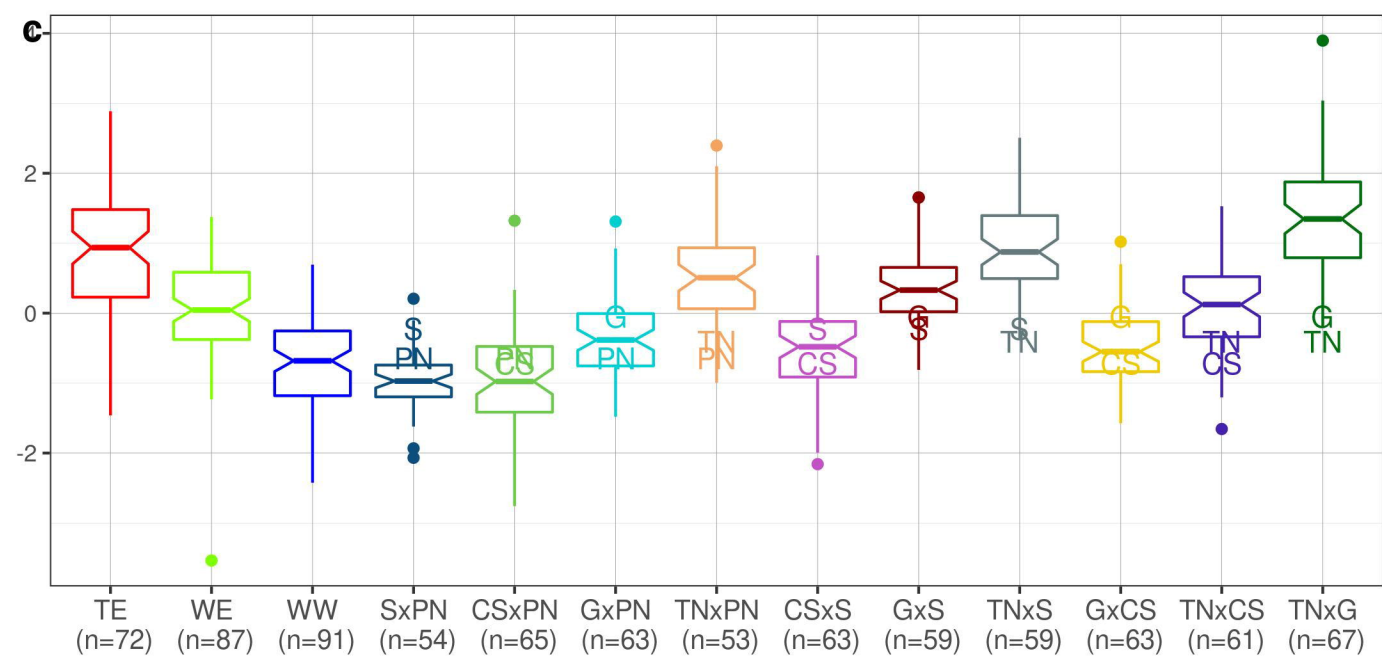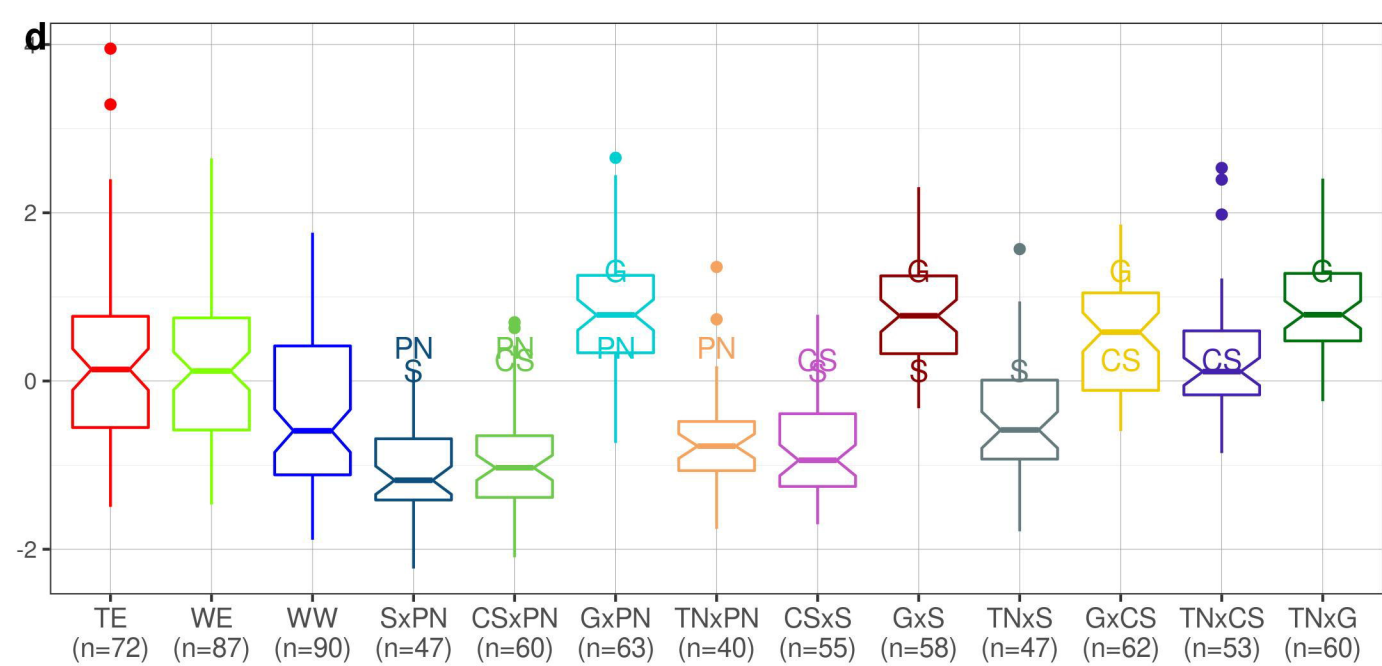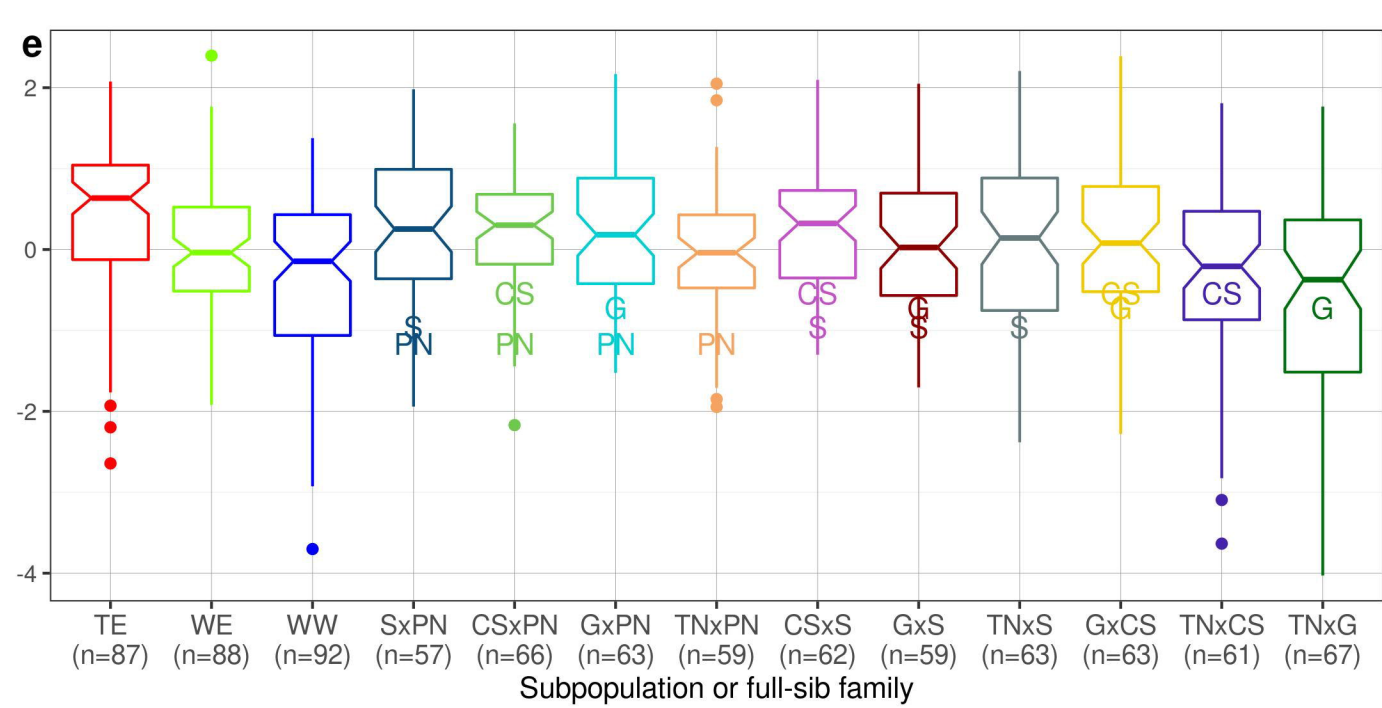

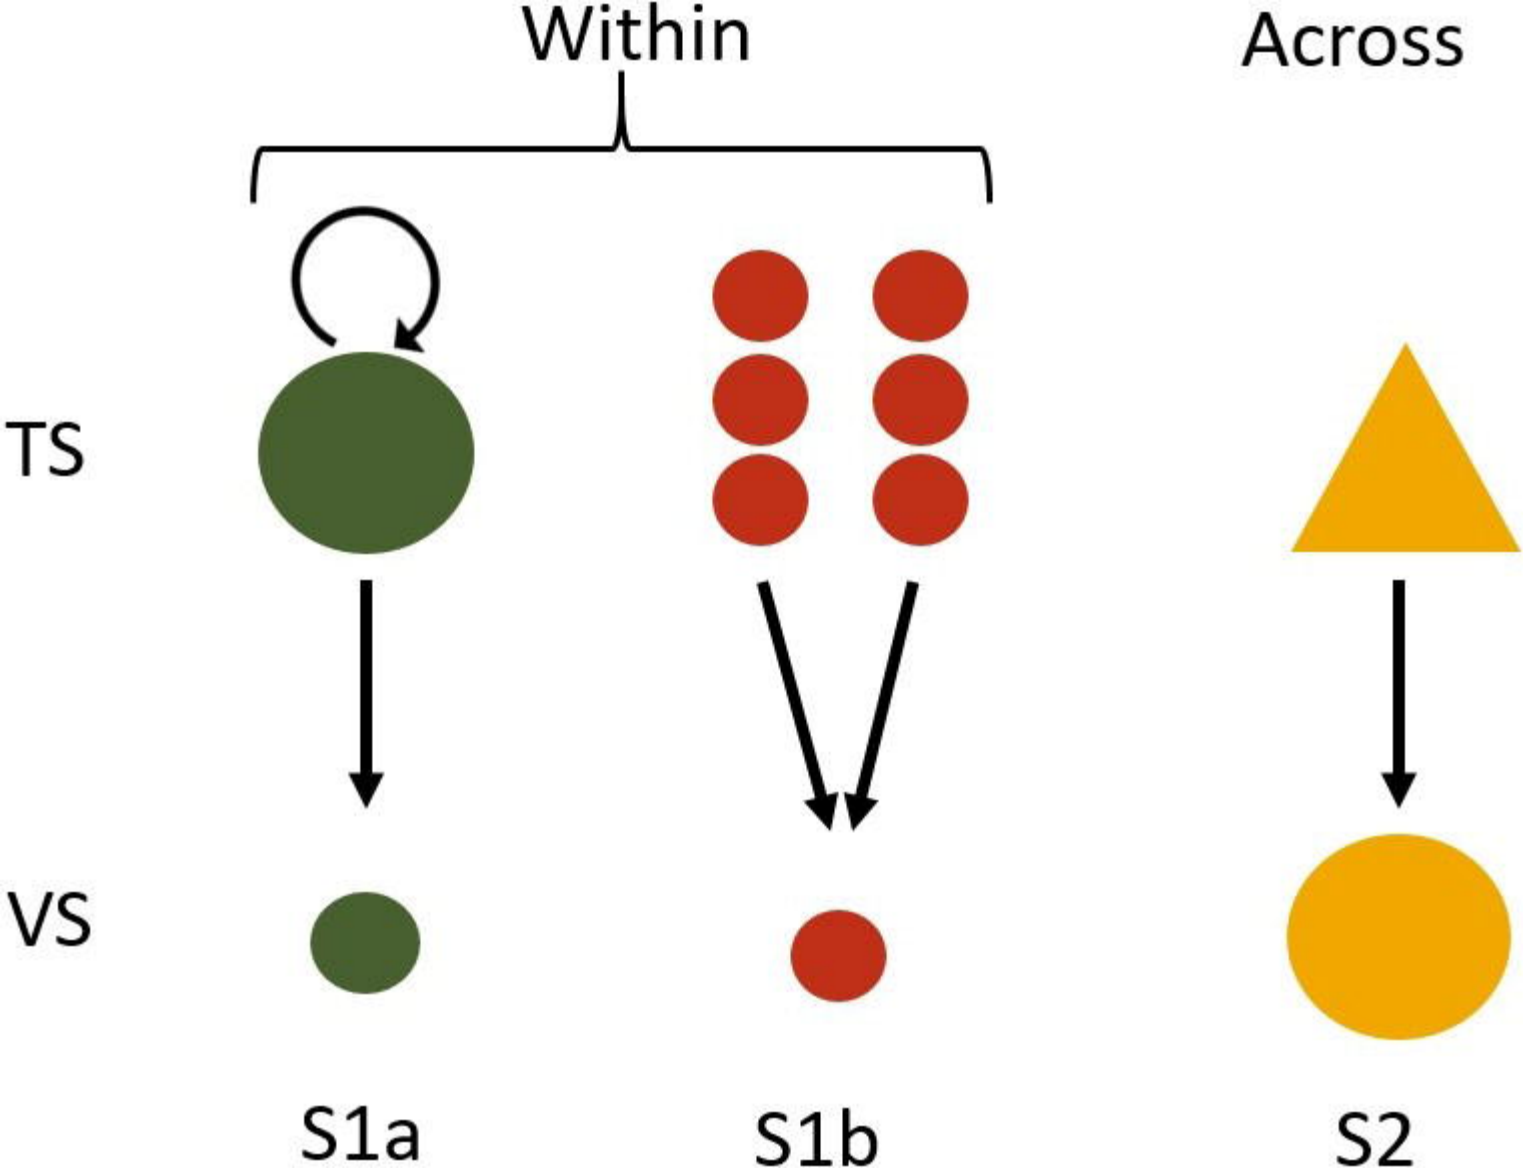

**a**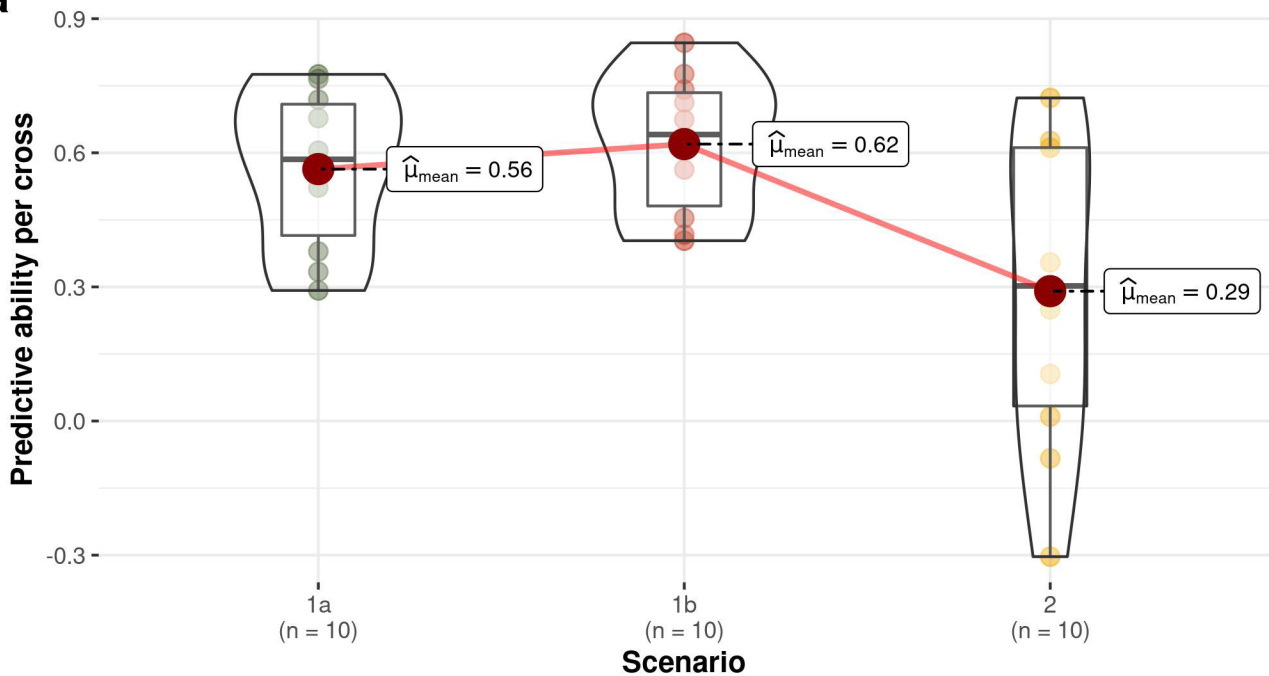**b**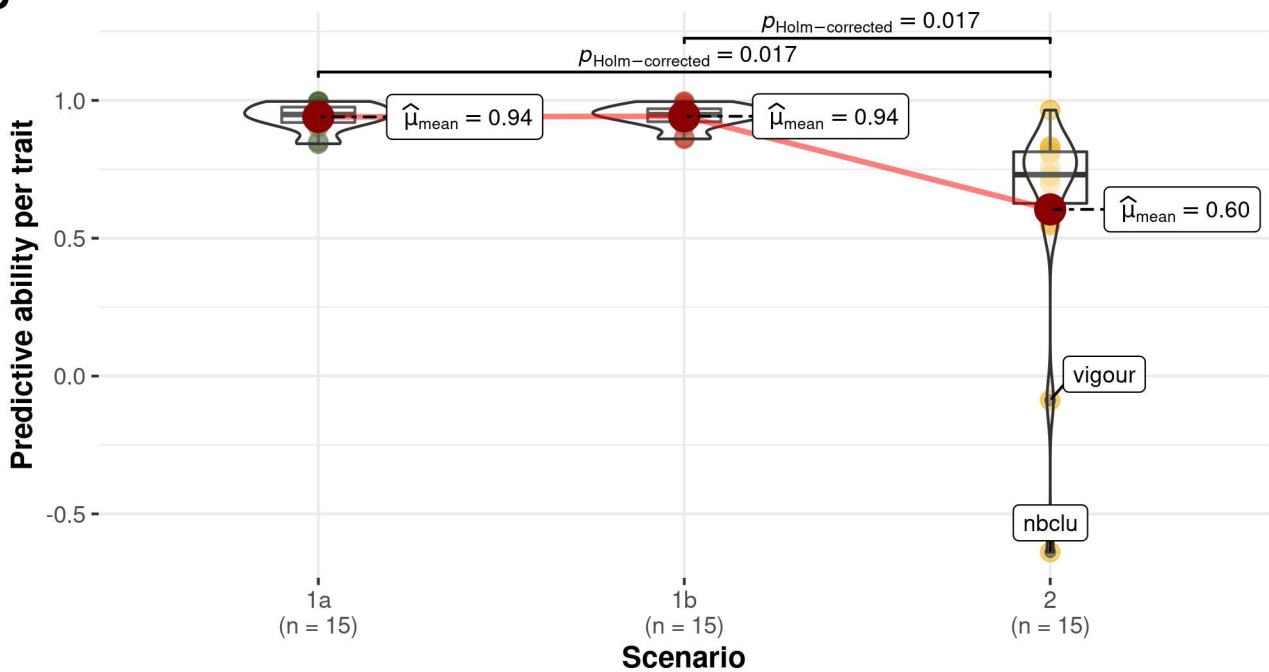



**a**

bioRxiv preprint doi: <https://doi.org/10.1101/2021.07.29.454290>; this version posted July 30, 2021. The copyright holder for this preprint (which was not certified by peer review) is the author/funder, who has granted bioRxiv a license to display the preprint in perpetuity. It is made available under aCC-BY 4.0 International license.

### Predictive ability per cross for scenario 1a

Best predictive ability among RR and LASSO

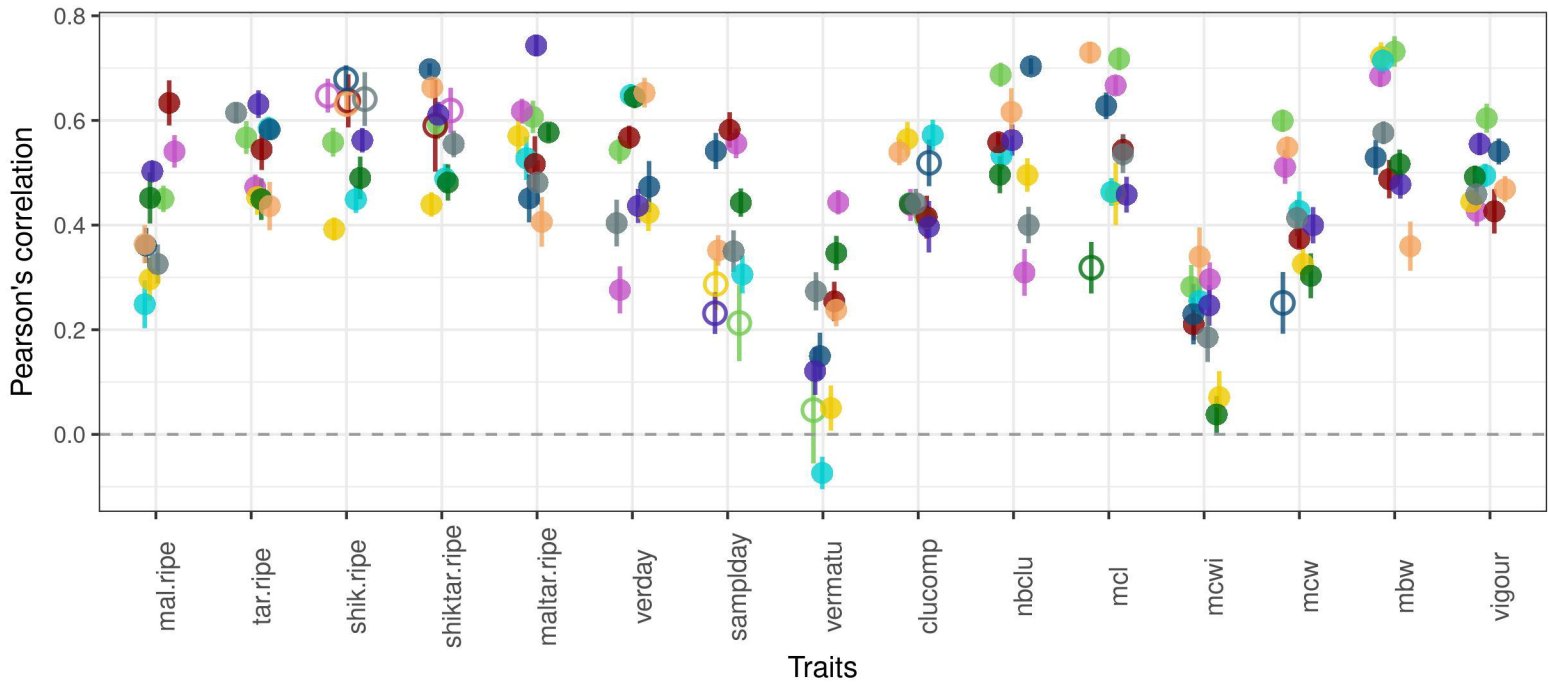**b**

### Comparison of predictive ability between scenarios

Best predictive ability among RR and LASSO

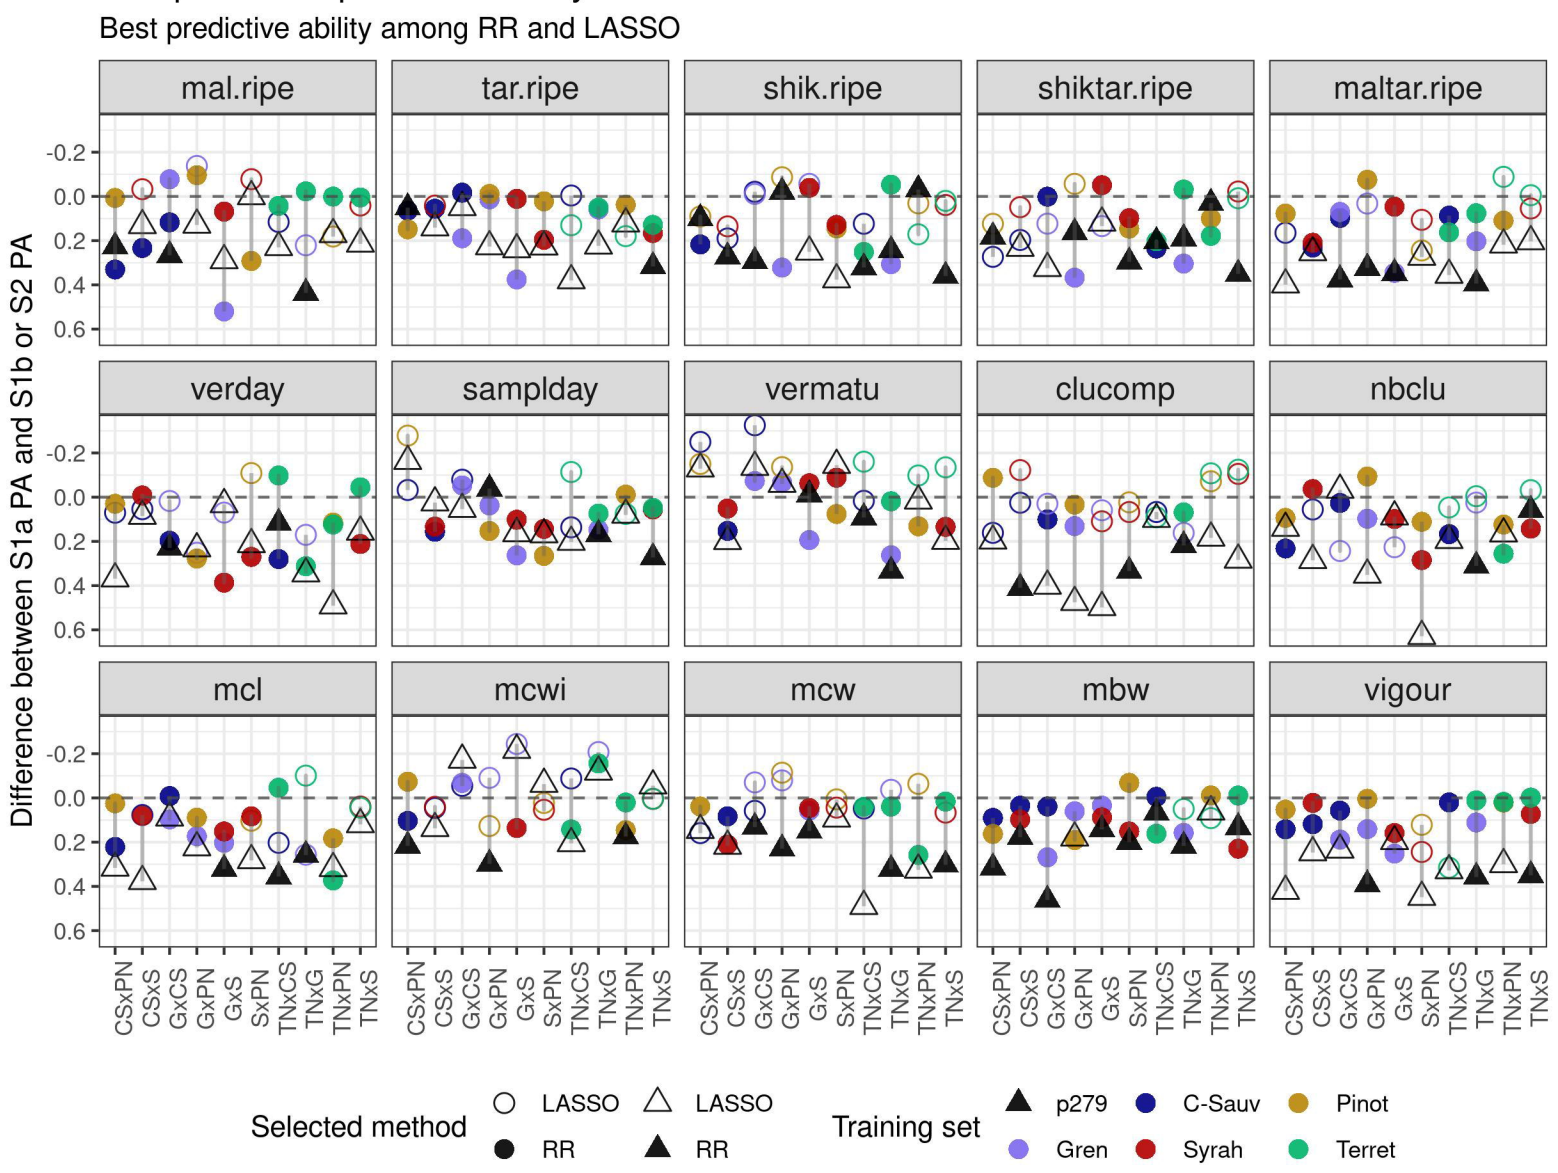

**a**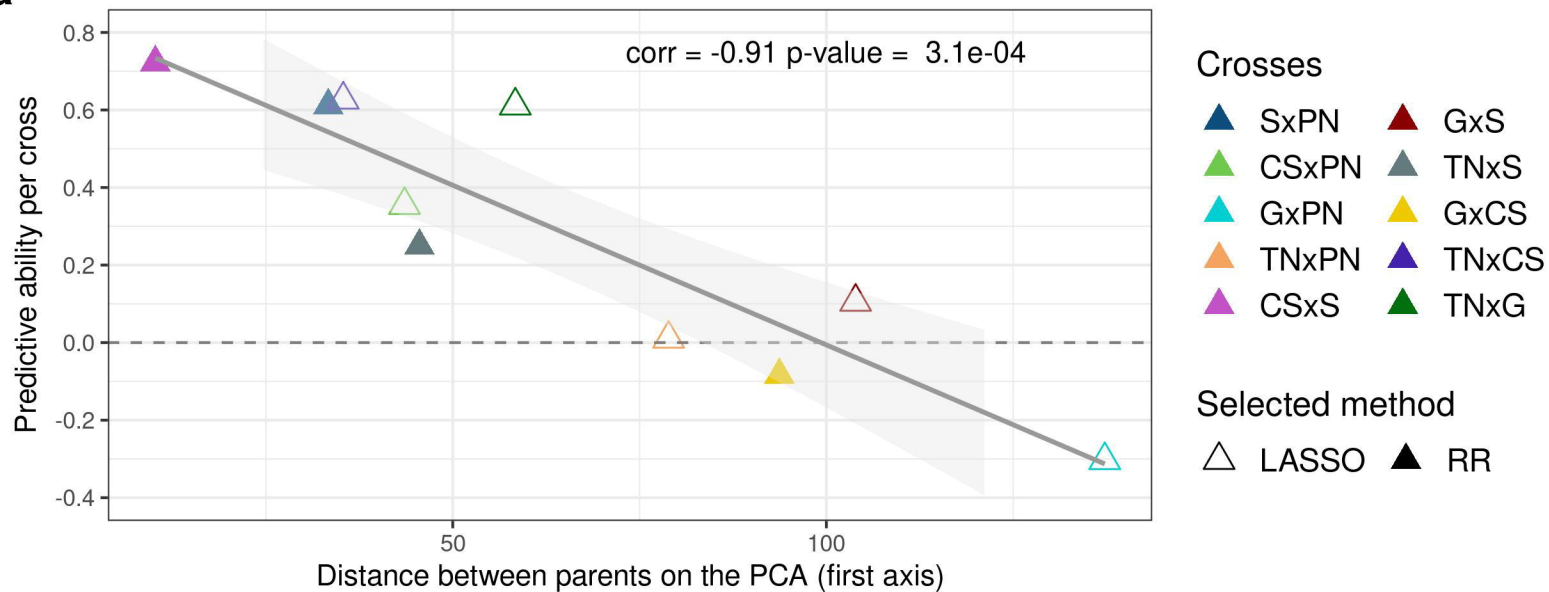**b**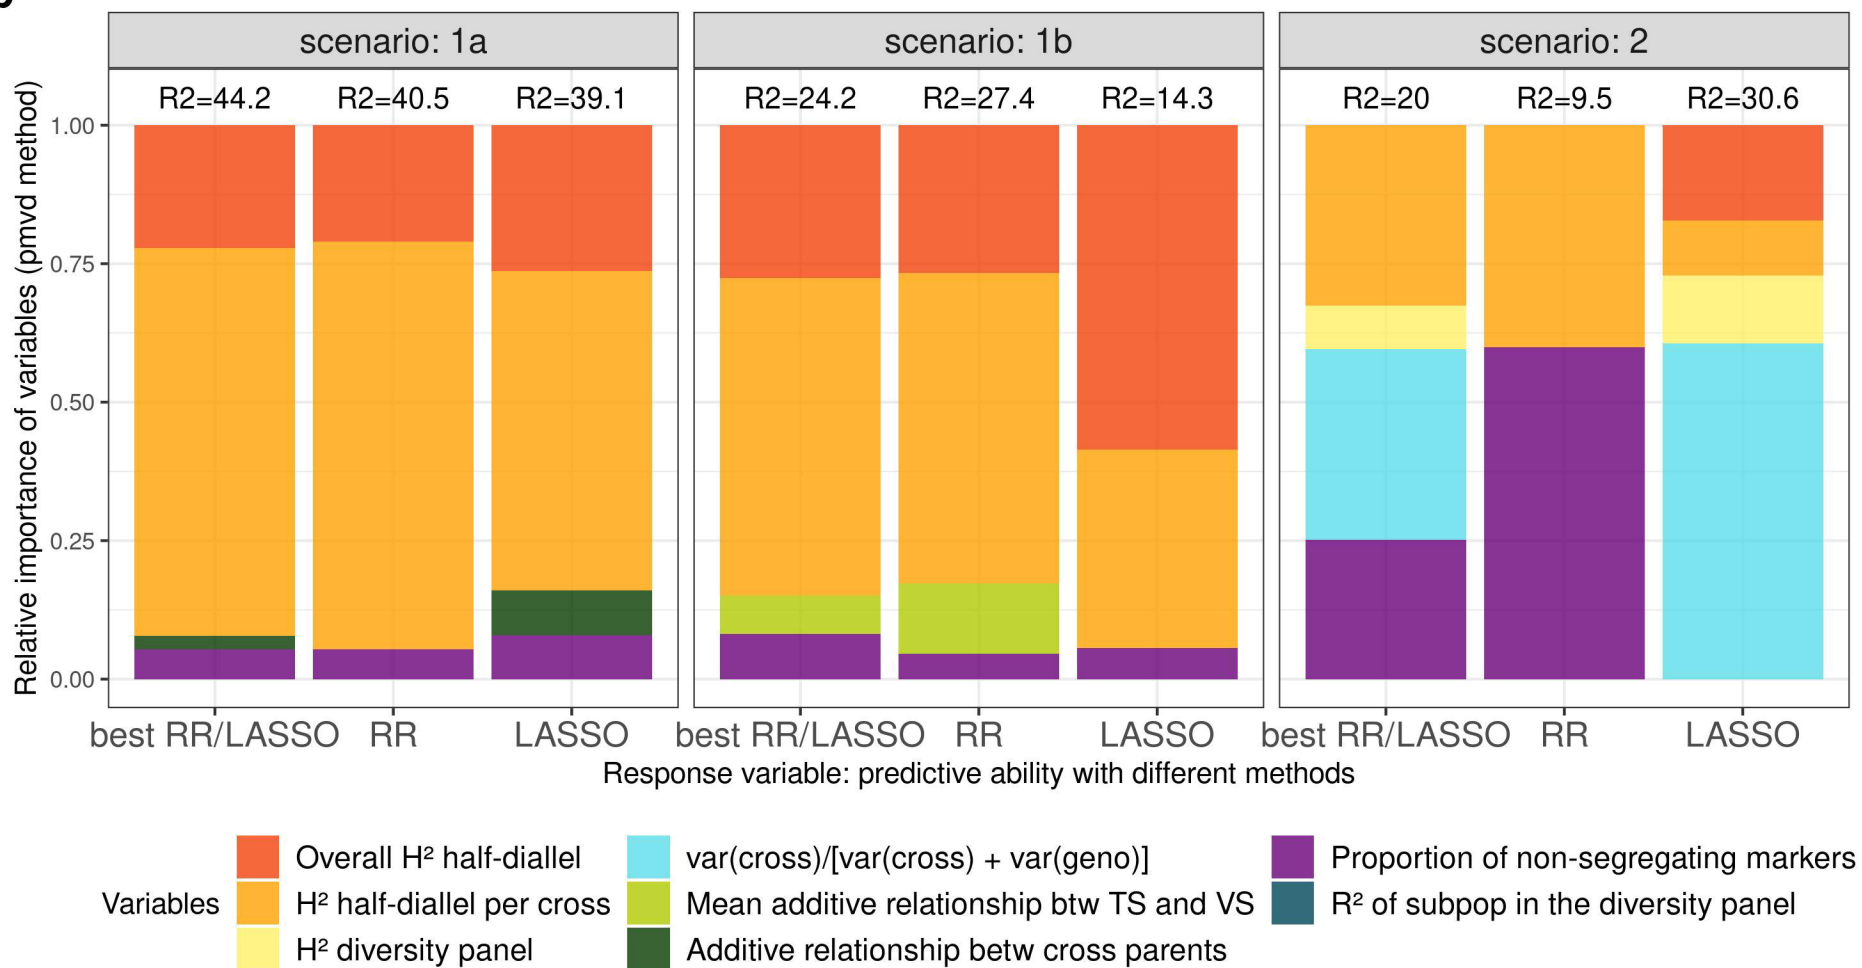



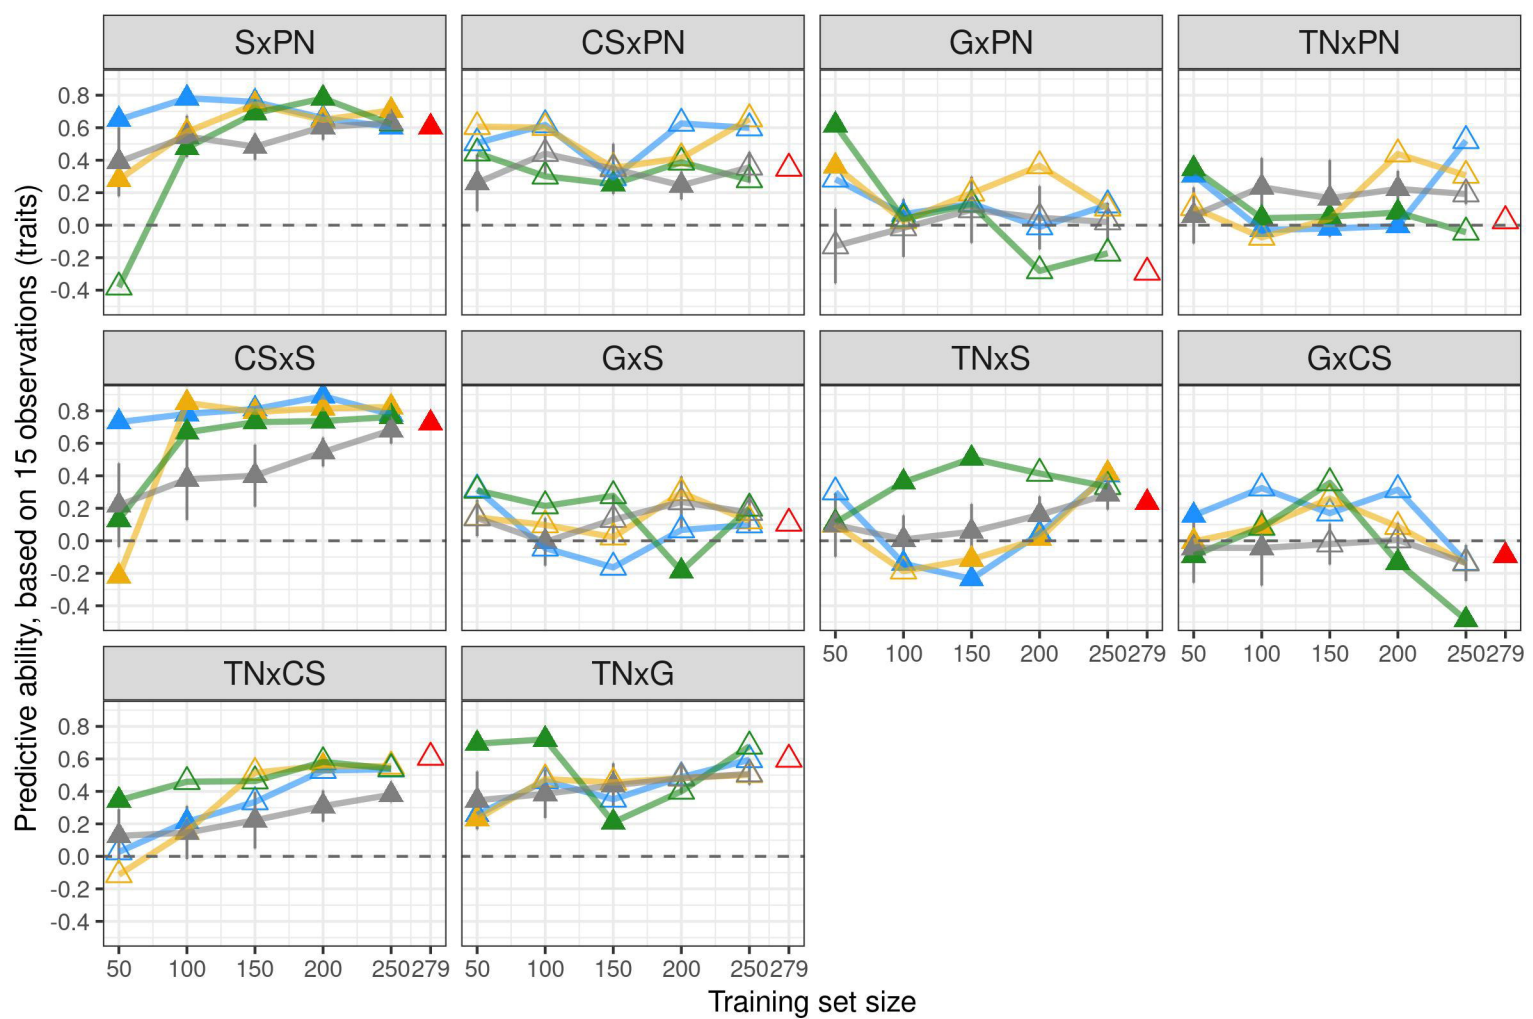

CD mean

Random TS

Best method  $\triangle$  LASSO  $\blacktriangle$  RR

Optimization method PEV mean

Whole diversity panel

Mean additive relationship
